## **Ciliary phosphatidylinositol phosphatase Inpp5e plays positive and negative regulatory roles in Shh signaling**

**Running title: Inpp5e attenuates Shh response**

Sandii Constable<sup>1,3</sup>, Alyssa B. Long<sup>1</sup>, Katharine A. Floyd<sup>1</sup>, Stéphane Schurmans<sup>2</sup> and Tamara Caspary<sup>1\*</sup>

<sup>1</sup>Department of Human Genetics, Emory University School of Medicine, Atlanta, GA;

<sup>2</sup>Laboratory of Functional Genetics, GIGA-R Centre, Université de Liège, Belgium;

<sup>3</sup>Department of Cell Biology, University of Texas Southwestern Medical Center, Dallas, TX (present address)

\*Author for correspondence ([tcaspar@emory.edu](mailto:tcaspar@emory.edu))

**Key Words:** Inpp5e, phosphatidylinositol phosphatase, cilia, Sonic hedgehog, neural tube patterning

Author Contributions: Conceptualization, S.C., T.C.; Methodology, S.C., A.B.L. and T.C.; Validation, S.C., K.F. and A.B.L.; Formal Analysis, S.C.; Investigation, S.C., K.F., A.B.L.; Resources, S.S.; Writing – Original Draft, S.C. and T.C.; Writing – Review & Editing, S.C., A.B.L. and T.C.; Visualization, S.C., K.F. and A.B.L.; Supervision, T.C.; Project Administration, T.C.; Funding Acquisition, T.C.

## 1 **Summary statement**

2 Inpp5e attenuates Sonic hedgehog signal transduction through a combination of positive and  
3 negative regulatory roles that likely control the relative timing of Gli processing.

## 5 **Abstract**

7 Sonic hedgehog (Shh) signal transduction specifies ventral cell fates in the neural tube  
8 and is mediated by the Gli transcription factors that play both activator (GliA) and repressor  
9 (GliR) roles. Cilia are essential for Shh signal transduction and the ciliary phosphatidylinositol  
10 phosphatase, Inpp5e, is linked to Shh regulation. In the course of a forward genetic screen for  
11 recessive mouse mutants, we identified a functional null allele of *Inpp5e*, *ridge top* (*rdg*), with  
12 expanded ventral neural cell fates at E10.5. By E12.5, *Inpp5e*<sup>rdg/rdg</sup> embryos displayed normal  
13 neural patterning and this correction over time required Gli3, the predominant repressor in  
14 neural patterning. *Inpp5e*<sup>rdg</sup> function largely depended on the presence of cilia and on  
15 Smoothed, the obligate transducer of Shh signaling, indicating Inpp5e functions within the  
16 cilium to regulate the pathway. These data indicate that Inpp5e plays a more complicated role in  
17 Shh signaling than previously appreciated. We propose that Inpp5e attenuates Shh signaling in  
18 the neural tube through regulation of the relative timing of GliA and GliR production, which is  
19 important in understanding how duration of Shh signaling regulates neural tube patterning.

## 21 **Introduction**

23 Shh signaling plays a major role in determining the identity of the ventral cell fates in the  
24 developing neural tube (Echelard et al., 1993, Roelink et al., 1994). The cells at the ventral  
25 midline, called the floor plate, require a high concentration of Shh during a critical  
26 developmental time window (Ribes et al., 2010). Other ventral cell fates are specified due to  
27 both the concentration and duration of Shh signaling. For example, Nkx2.2-positive V3  
28 interneuron precursors, can be specified by either high concentrations of Shh or by increasing  
29 time of exposure to lower amounts of Shh (Dessaud et al., 2007). The ability of a cell to monitor  
30 the duration of signaling is thus critical but we currently lack a detailed understanding of how  
31 cells interpret the duration of Shh signal.

33 The downstream effectors of Shh signaling are the Gli transcription factors Gli1, Gli2 and  
34 Gli3, which possess context-dependent activator and repressor functions. In the neural tube,

35 Gli2 is the primary activator and Gli3 is the major repressor (Ding et al., 1998, Matise et al.,  
36 1998, Litingtung and Chiang, 2000, Persson et al., 2002). Full length Gli protein is processed to  
37 a mature activator (GliA) form or cleaved to a repressor (GliR) form based on the presence or  
38 absence of Shh ligand. GliR production in the absence of ligand depends on the orphan G-  
39 protein receptor Gpr161 increasing cAMP levels and protein kinase A (PKA) activity  
40 (Mukhopadhyay et al., 2013). PKA is crucial both to phosphorylate full length Gli at four specific  
41 sites which promotes its cleavage to GliR as well as to further phosphorylate full length Gli and  
42 prevent it from being processed to GliA (Mukhopadhyay et al., 2013, Niewiadowski et al., 2014).  
43 Thus, *Shh* mutants produce only GliR and do not specify ventral cell fates (Litingtung and  
44 Chiang, 2000, Chiang et al., 1996). In contrast, upon Shh stimulation, decreased ciliary cAMP  
45 levels antagonize PKA activity, preventing GliR and enabling GliA production (Moore et al.,  
46 2016). Thus, the physiological Shh response at any given position in the neural tube is  
47 determined by an effective Gli ratio, which integrates opposing gradients of activating GliA and  
48 repressive GliR.

49  
50 The primary cilium is a microtubule-based projection found on almost all cells and is  
51 intimately associated with Shh signaling (Huangfu et al., 2003, Corbit et al., 2005, Rohatgi et al.,  
52 2007, Haycraft et al., 2005). Mutations in proteins required for cilia biogenesis and function lead  
53 to a breakdown in Shh signal transduction regulation and either an increase or an absence of  
54 ventral neural cell fates (reviewed in (Bangs and Anderson, 2017)). Several components of the  
55 Shh signaling pathway traffic to cilia and move dynamically upon pathway stimulation. These  
56 include the Shh receptor, Patched1 (Ptch1), and the obligate transducer of the pathway,  
57 Smoothed (Smo) (Corbit et al., 2005, Rohatgi et al., 2007). Smo enriches in cilia upon Shh  
58 stimulation and this enhanced localization is necessary but not sufficient for its activation.  
59 Concomitantly, Gli proteins are enriched at the ciliary tip (Haycraft et al., 2005). Upon genetic  
60 ablation of cilia, no ventral cell fates are specified because Gli proteins are not processed to  
61 either GliA or to GliR (Huangfu and Anderson, 2005, Liu et al., 2005).

62  
63 The ciliary membrane is biochemically distinct from the plasma membrane as its  
64 phosphatidyl inositol (PI) composition is enriched for phosphatidyl inositol 4 phosphate (PI(4)P).  
65 (Chavez et al., 2015, Garcia-Gonzalo et al., 2015). PI(4)P is important in regulating the ciliary  
66 localization of Ptch1, as well as ciliary enrichment and activation of Smo (Jiang et al., 2016). In  
67 *Drosophila*, PI(4)P is converted between PI(4)P and PI by Sac1 phosphatase and Stt4 kinase.  
68 Sac1 mutants accumulate PI(4)P, leading to increased Shh signaling response (Yavari et al.,

69 2010). Similarly, *ptc* mutants accumulate PI(4)P and increase Shh pathway activation (Yavari et  
70 al., 2010). This mechanism is conserved in mammalian cells where treatment of NIH3T3 cells  
71 with PI(4)P induces pathway activation along with Smo ciliary enrichment (Jiang et al., 2016).  
72 PI(4)P binds to both Ptch1 and Smo (Jiang et al., 2016). Stimulation with Shh increases binding  
73 of PI(4)P to Smo and decreases binding to Ptch1, making this molecule an attractive candidate  
74 to explain how Ptch1 inhibits Smo, a critical step in Shh signaling (Jiang et al., 2016).

75

76 The ciliary inositol polyphosphate-5-phosphatase E (*Inpp5e*) converts PI(3,4,5)P<sub>3</sub> and  
77 PI(4,5)P<sub>2</sub> (hereafter PIP<sub>2</sub>) to PI(3,4)P<sub>2</sub> and PI(4)P respectively (Kisseleva et al., 2000). *Inpp5e*  
78 localizes to cilia where it maintains PI(4)P levels (Chavez et al., 2015, Garcia-Gonzalo et al.,  
79 2015, Jacoby et al., 2009, Bielas et al., 2009). Previous work investigated the role of *Inpp5e* in  
80 regulating Shh signaling. Mouse embryonic fibroblasts (MEFs) and neural stem cells lacking  
81 *Inpp5e* with either of two distinct null alleles, *Inpp5e*<sup>tm1.1Cmit</sup> (hereafter *Inpp5e*<sup>ΔEx2-6</sup>) or  
82 *Inpp5e*<sup>tm1.2Ssch</sup> (hereafter *Inpp5e*<sup>ΔEx7-8</sup>), display a diminished transcriptional response upon Shh  
83 stimulation (Chavez et al., 2015, Dyson et al., 2017, Garcia-Gonzalo et al., 2015). This  
84 correlates with increased ciliary PIP<sub>2</sub> levels recruiting Tulp3 and the Shh antagonist Gpr161 into  
85 cilia (Garcia-Gonzalo et al., 2015, Dyson et al., 2017). Gpr161 resides in the cilium in the  
86 absence of Shh and generates cAMP (Mukhopadhyay et al., 2013). Increased levels of cAMP  
87 activate PKA which phosphorylates full length Gli2 and Gli3 resulting in cleavage to GliR and  
88 repression of the Shh response (Tuson et al., 2011, Wang et al., 2000). Consistent with this, the  
89 ventral-most neural cell fates requiring the highest level of Shh response are lost in *Inpp5e*<sup>ΔEx2-</sup>  
90 <sup>6/ΔEx2-6</sup> embryos (Dyson et al., 2017). The simplest interpretation of these data is that *Inpp5e*  
91 normally plays an activating role in Shh signaling. However, ventral neural cell fates requiring  
92 intermediate levels of Shh response are dorsally expanded in the *Inpp5e*<sup>ΔEx2-6/ΔEx2-6</sup> mutants  
93 suggesting a more complicated mechanism is at play (Dyson et al., 2017).

94

95 Here, we investigate the role of *Inpp5e* in the Shh signaling pathway using an *Inpp5e*  
96 point mutant we identified in a forward genetic screen. We genetically demonstrate that this  
97 mutation generates a functional null allele and that loss of *Inpp5e* activity leads to an initial  
98 expansion of ventral neural tube cell fates indicating *Inpp5e* negatively regulates the Shh  
99 response. Interestingly, we found that the ventral pattern corrects over time and we demonstrate  
100 this mechanism requires Gli3, the predominant repressor in neural patterning. *Inpp5e* localizes  
101 to cilia, which we show are required for *Inpp5e* function in regulating Shh signaling. We found  
102 that when *Inpp5e* function is absent, Smo is required for the highest Shh response but not for

103 more intermediate Shh patterning responses. From these data, we propose that *Inpp5e* plays a  
104 critical role in controlling the level of Shh response over time by attenuating the pathway through  
105 control of the timing of GliA/GliR gradient production. These data provide a mechanistic  
106 framework from which to understand how the duration of Shh signaling regulates ventral neural  
107 cell fate.

108

## 109 **Results**

110

### 111 *Inpp5e* negatively regulates the Shh signaling response in the E10.5 neural tube

112

113 We previously published the *Inpp5e*<sup>M2</sup> line, and showed it carried an A-to-G transition in  
114 the mouse *Inpp5e* gene as well as a change in the *Slc2a6* gene 0.625 Mb away (Sun et al.,  
115 2012). To eliminate the *Slc2a6* mutation, we backcrossed to FVB and generated the  
116 recombinant chromosome carrying only the *Inpp5e* mutation. To distinguish this recombinant  
117 line from the *Inpp5e*<sup>M2</sup> line, we refer to this line as *ridge top* (*rdg*), *Inpp5e*<sup>rdg</sup>, to reflect the  
118 exencephaly that resembles a ridgetop hat.

119 We evaluated neural tube patterning in *Inpp5e*<sup>rdg/rdg</sup> mutant embryos at embryonic day  
120 (E) 10.5 by staining sections with antibodies for specific cell fates. Shh is initially expressed in  
121 the notochord and subsequently in the floor plate, which also expresses FoxA2 (Echelard et al.,  
122 1993, Roelink et al., 1994, Sasaki and Hogan, 1994, Riddle et al., 1993). In wild type and  
123 *Inpp5e*<sup>rdg/rdg</sup> mutants, the floor plate was visible and expressed both Shh and FoxA2 (Fig. 1A, B,  
124 F, G). Additionally, we observed FoxA2 positive cells that did not co-express Shh scattered  
125 dorsally within the ventricular zone in *Inpp5e*<sup>rdg/rdg</sup> mutants (Fig. 1G). In wild type sections, p3  
126 cells adjacent to the floorplate expressed Nkx2.2 whereas in *Inpp5e*<sup>rdg/rdg</sup> mutant sections,  
127 Nkx2.2-positive cells expanded dorsally in a dispersed manner, similar to what we observed  
128 with FoxA2 (Fig. 1C, H). Additional ventral cell fates expressing Nkx6.1 and Olig2 also  
129 expanded dorsally in the *Inpp5e*<sup>rdg/rdg</sup> mutants (Fig. 1H, I). The dorsal boundary for all the  
130 expanded cell fates correlated to the ventral boundary of Pax6, which is repressed by Shh  
131 signaling (Lek et al., 2010, Ericson et al., 1997). This boundary is shifted dorsally in *Inpp5e*<sup>rdg/rdg</sup>  
132 mutants compared to wild type controls (Fig. E, J). Taken together, these data demonstrate an  
133 expansion of Shh-dependent ventral cell fates in *Inpp5e*<sup>rdg/rdg</sup> mutant embryos, suggesting an  
134 expansion of the Shh activity gradient in the *Inpp5e*<sup>rdg/rdg</sup> neural tube.

135 In order to monitor the Shh activity gradient, we used a *Ptch1*<sup>LacZ</sup> allele as *Ptch1* is a  
136 transcriptional target of the Shh signaling pathway (Goodrich et al., 1997, Goodrich et al., 1996).

137 Upon X-gal staining of whole E10.5 wild type and *Inpp5e*<sup>rdg/rdg</sup> mutant embryos, we detected  
138 blue staining reflecting the Shh transcriptional response (Fig. 1K, M). In wild type embryos, we  
139 observed staining in known Shh signaling centers including the notochord and the zone of  
140 polarizing activity in the limb buds (Fig. 1K). These regions also stained blue in the *Inpp5e*<sup>rdg/rdg</sup>;  
141 *Ptch1*<sup>LacZ/+</sup> mutant embryos indicating Shh activity (Fig. 1M). In neural tube sections of wild type  
142 *Ptch1*<sup>LacZ/+</sup> embryos, we saw a steep *LacZ* expression gradient with the strongest blue staining  
143 at the ventral midline of the neural tube (Fig. 1L). In contrast, the staining expanded dorsally in  
144 the *Inpp5e*<sup>rdg/rdg</sup>; *Ptch1*<sup>LacZ/+</sup> mutant embryos (Fig. 1N), consistent with the dorsal expansion of  
145 ventral cell fates we observed and indicating dorsally expanded Shh activity in *Inpp5e*<sup>rdg/rdg</sup>;  
146 *Ptch1*<sup>LacZ/+</sup> mutants.

147 At a mechanistic level, Smo ciliary enrichment correlates with Smo activation, so we  
148 examined Smo staining in neural tube cilia (Corbit et al., 2005). In wild type sections, we  
149 observed ciliary Smo enrichment near the ventral midline (Fig. 1O). However, in *Inpp5e*<sup>rdg/rdg</sup>  
150 embryos, we found Smo-positive cilia expanded dorsally along the ventricular zone (Fig. 1P).  
151 The *Inpp5e*<sup>rdg/rdg</sup> neural tube shape is abnormal, almost triangular. Thus, to quantify the Smo  
152 expansion, we drew a line along the entire neural tube lumen to calculate total luminal distance.  
153 We found no statistical difference in total neural tube distance between wild type and  
154 *Inpp5e*<sup>rdg/rdg</sup> suggesting the *Inpp5e*<sup>rdg/rdg</sup> neural tube is simply misshapen (p>0.5). We then  
155 measured the distance over which we observed ciliary Smo enrichment and report this as a  
156 percentage of the total distance of the neural tube lumen (Fig. 1Q). We found ciliary Smo  
157 enrichment in the ventral 10% of the neural tube in wild type sections and in the ventral 40% of  
158 the neural tube in *Inpp5e*<sup>rdg/rdg</sup> sections (p<0.001) (Fig. 1Q). This dorsal expansion of ciliary Smo  
159 enrichment correlates with both the expanded Shh response shown with the *Ptch1-LacZ*  
160 reporter and the dorsal expansion of cell fates shown by immunofluorescence, suggesting that  
161 the ciliary Smo is activated. Taken together, these data indicate that the normal role of *Inpp5e* is  
162 to negatively regulate the Shh signaling response in the E10.5 neural tube.

163  
164 *Inpp5e*<sup>rdg</sup> is a functional null allele sensitive to strain background

165  
166 The *Inpp5e*<sup>rdg</sup> allele changed aspartic acid to glycine at residue 511 within the  
167 phosphatase domain of *Inpp5e*, *Inpp5e*<sup>D511G</sup> (Fig. 2A, B). This region of the protein sequence is  
168 highly conserved across species (Fig. 2C). At E12.5, most *Inpp5e*<sup>rdg/rdg</sup> embryos exhibited  
169 exencephaly (88%, 61/69) and either microphthalmia or anophthalmia (80%, 33/41). 77%  
170 (31/40) of embryos exhibited a rough neural tube with 30% showing spina bifida at the hindlimb



171 level (13/40) (Fig. 2E). The *Inpp5e*<sup>rdg/rdg</sup> embryos died around E13.5. In order to determine  
172 whether the D511G mutation was causative, we crossed *Inpp5e*<sup>rdg/+</sup> to mice carrying an *Inpp5e*  
173 deleted allele (*Inpp5e*<sup>ΔEx7-8/+</sup>) and examined the compound heterozygote embryos. *Inpp5e*<sup>rdg/ΔEx7-</sup>  
174 <sup>8</sup> embryos display exencephaly, anophthalmia, spina bifida and a rough neural tube indicating  
175 the alleles failed to complement and that *Inpp5e*<sup>rdg</sup> is an allele of *Inpp5e* (Fig. 2F).

176 Upon stimulation of cultured cells with the Shh agonist SAG, cells lacking *Inpp5e* show a  
177 diminished Shh response (Chavez et al., 2015, Dyson et al., 2017, Garcia-Gonzalo et al., 2015).  
178 To determine the Shh response of cells carrying *Inpp5e*<sup>rdg</sup>, we generated MEFs from  
179 *Inpp5e*<sup>rdg/rdg</sup> and control littermate embryos and tested their ability to respond to Shh stimulation.  
180 As expected, we found control MEFs increased expression of *Gli1*, a Shh target gene, upon  
181 stimulation with Shh-conditioned media (Fig. 2H) ( $p < 0.01$ ). However, the *Inpp5e*<sup>rdg/rdg</sup> MEFs  
182 displayed no change in *Gli1* levels when treated with Shh (Fig. 2H). Similar results have been  
183 shown for cell lines lacking *Inpp5e* function (Chavez et al., 2015, Dyson et al., 2017, Garcia-  
184 Gonzalo et al., 2015). Thus, the *Inpp5e*<sup>rdg</sup> allele phenocopies *Inpp5e* null alleles in cultured  
185 cells.

186 The fact that *Inpp5e*<sup>rdg/rdg</sup> embryos died at E13.5 contrasts with the two previously  
187 studied *Inpp5e* null alleles: *Inpp5e*<sup>ΔEx7-8</sup> which deletes exons 7-8 and *Inpp5e*<sup>ΔEx2-6</sup> which deletes  
188 exons 2-6 (Fig. 2B). Both of these deletion mutants die at birth and both were analyzed on a  
189 predominantly C57BL/6 background (with some possible contribution from 129/Sv) (Dyson et  
190 al., 2017, Jacoby et al., 2009). Our analysis of the *Inpp5e*<sup>rdg</sup> allele was on an FVB background.  
191 To distinguish whether such phenotypic distinctions reflected differences in allelic function or  
192 strain background, we backcrossed the *Inpp5e*<sup>ΔEx7-8</sup> allele onto FVB for three generations. We  
193 found that these FVB-*Inpp5e*<sup>ΔEx7-8/ΔEx7-8</sup> embryos died at E13.5-14.5 and displayed exencephaly,  
194 anophthalmia, spina bifida and a rough neural tube (Fig. 2G). We also examined neural tube  
195 patterning in E10.5 FVB-*Inpp5e*<sup>ΔEx7-8/ΔEx7-8</sup> embryos and found expanded ventral neural cell fates  
196 comparable to *Inpp5e*<sup>rdg/rdg</sup> (Fig. S1A-J). Thus, the *Inpp5e*<sup>ΔEx7-8</sup> allele on the FVB background  
197 phenocopies the *Inpp5e*<sup>rdg</sup> allele. We performed the reciprocal experiment and crossed the  
198 *Inpp5e*<sup>rdg</sup> allele onto the C57BL/6 background for four generations. We identified live B6-  
199 *Inpp5e*<sup>rdg/rdg</sup> embryos at E16.5 (6/25, 24%) that displayed exencephaly (5/6), spina bifida (2/6),  
200 microphthalmia or anophthalmia (6/6) and hindlimb preaxial polydactyly (5/6) (Fig. 2I-K'). In  
201 contrast, we found no *Inpp5e*<sup>rdg/rdg</sup> embryos at E16.5 on the FVB background (0/51). Taken  
202 together, these data indicate that *Inpp5e*-dependent phenotypes are sensitive to genetic  
203 background and that *Inpp5e*<sup>rdg</sup> is a functional null allele.

204

205 *Normal ventral neural patterning in E12.5  $Inpp5e^{rdg/rdg}$  mutant embryos indicates recovery of*  
206 *patterning over time*

207

208 In the course of comparing the phenotypes of the  $Inpp5e^{rdg}$  and  $Inpp5e^{\Delta Ex7-8}$  alleles, we  
209 evaluated neural patterning at E12.5. In  $Inpp5e^{rdg/rdg}$  embryos, we found FoxA2 expression was  
210 restricted to the floor plate as in control embryos (Fig. 3A, E). Similarly, we found Nkx2.2-  
211 positive cells only in the p3 domain adjacent to the floor plate in control and  $Inpp5e^{rdg/rdg}$  mutant  
212 embryos (Fig. 3B, F). Overall, Olig2- and Nkx6.1-positive cells appeared in their normal  
213 domains with only slight expansion of the pMN domain of  $Inpp5e^{rdg/rdg}$  embryos compared to  
214 controls (Fig. 3B, C, F, G). These data indicate that the Shh response in  $Inpp5e^{rdg/rdg}$  mutant  
215 embryos is comparable to wild type by E12.5. We also observed normal patterning in FVB-  
216  $Inpp5e^{\Delta Ex7-8/\Delta Ex7-8}$  embryos, indicating the recovery of the Shh response also occurs in this allele  
217 (Fig. S1K-T).

218 Pax6 expression is repressed by Shh signaling (Ericson et al., 1997). In order to test  
219 whether the dorsal boundary of the Shh response is normal in  $Inpp5e^{rdg/rdg}$  and  $Inpp5e^{\Delta Ex7-8/\Delta Ex7-8}$   
220 embryos, we stained neural tube sections with antibody against Pax6. We found Pax6  
221 expression in  $Inpp5e^{rdg/rdg}$  and  $Inpp5e^{\Delta Ex7-8/\Delta Ex7-8}$  embryos appeared the same as in wild type  
222 controls (Fig. 3D, H; Fig. S1K-T). Thus, the abnormal ventral patterning we observed in E10.5  
223  $Inpp5e^{rdg/rdg}$  and  $Inpp5e^{\Delta Ex7-8/\Delta Ex7-8}$  embryos recovers by E12.5. Taken together, these data imply  
224 that  $Inpp5e$  is not simply a negative regulator of the Shh response in the neural tube.

225

226 *Altered ciliary enrichment of Tulp3 and Gpr161 in  $Inpp5e^{rdg/rdg}$  neural tubes*

227

228  $Inpp5e$  removes the 5-phosphate from PI(3,4,5)P<sub>3</sub> and PI(4,5)P<sub>2</sub> and loss of  $Inpp5e$   
229 function results in increased ciliary PIP<sub>2</sub> (Garcia-Gonzalo et al., 2015, Chavez et al., 2015,  
230 Kisseleva et al., 2000). Tulp3 traffics G-protein coupled receptors (GPCRs) into cilia in a PIP<sub>2</sub>-  
231 dependent manner (Mukhopadhyay et al., 2010). Increased PIP<sub>2</sub> levels in  $Inpp5e$ -deficient cilia  
232 increases the amount of Tulp3 seen (Chavez et al., 2015, Garcia-Gonzalo et al., 2015). To  
233 determine whether  $Inpp5e^{rdg}$  affected Tulp3 localization in a similar manner, we stained E10.5  
234 neural tube sections with antibodies against Tulp3. We detected no Tulp3 in wild type neural  
235 tube cilia (Fig. 4A-C). In contrast, we observed Tulp3 staining in 90% of Arl13b positive luminal  
236 cilia in the ventral neural tube of the  $Inpp5e^{rdg/rdg}$  mutants (Fig. 4D-G). As Tulp3 is a known PIP<sub>2</sub>-  
237 binding protein, this result is consistent with  $Inpp5e^{rdg}$  being a loss-of-function allele that  
238 increases ciliary PIP<sub>2</sub>.



239 Increased PIP<sub>2</sub> in *Inpp5e*-deficient cilia recruits Shh antagonist Gpr161 via a PIP<sub>2</sub>/Tulp3-  
240 dependent mechanism (Chavez et al., 2015, Garcia-Gonzalo et al., 2015). To determine  
241 whether an increase in ciliary levels of Gpr161 occurred coincident with the increase in Tulp3,  
242 we examined the localization of Gpr161 in ventral neural tube cilia. In wild type embryos, 3.4%  
243 of cilia were Gpr161-positive, whereas 34% of cilia stained for Gpr161 in *Inpp5e*<sup>rdg/rdg</sup> embryos  
244 ( $p < 0.001$ ) (Fig. 4H-N). These data imply that in the neural tube, the increased PIP<sub>2</sub> in  
245 *Inpp5e*<sup>rdg/rdg</sup> mutant cilia efficiently recruits Tulp3 to cilia but Tulp3 is not sufficient to recruit  
246 Gpr161 to all cilia *in vivo*.

247

248 *Ift172*-dependent and -independent functions of *Inpp5e*

249

250 *Inpp5e* is predominately localized to the cilium (Bielas et al., 2009, Jacoby et al., 2009),  
251 and Shh signaling is tightly associated with the cilium (Huangfu et al., 2003, Goetz and  
252 Anderson, 2010). To determine whether the *Inpp5e*<sup>rdg/rdg</sup> neural tube patterning phenotype  
253 requires cilia, we generated *Inpp5e*<sup>rdg/rdg</sup>;*Ift172*<sup>wim/wim</sup> double mutant embryos. *Ift172* is an  
254 intraflagellar transport protein required for ciliary assembly and maintenance. *Ift172*<sup>wim/wim</sup> single  
255 mutants do not produce a cilium, show exencephaly without a groove at the ventral midline and  
256 do not specify ventral neural cell fates, with the exception of Nkx6.1-positive cells which are  
257 Shh-dependent and cilia-independent (Fig. 5E,F) (Huangfu et al., 2003, Norman et al., 2009,  
258 Briscoe et al., 2000). In contrast, *Inpp5e*<sup>rdg/rdg</sup> single mutants displayed pronounced exencephaly  
259 with a prominent groove at the midline (Fig. 5C). In the neural tube of *Inpp5e*<sup>rdg/rdg</sup> mutants at  
260 E9.5, we observed FoxA2 expression at the ventral midline which expanded dorsally albeit  
261 diffusely through the majority of the neural tube (Fig. 5D). We identified an additional dorsal  
262 expansion of ventral cells expressing Nkx2.2 and Olig2 intermingled with the FoxA2-positive  
263 cells (Fig. 5D, D'). We found *Inpp5e*<sup>rdg/rdg</sup>;*Ift172*<sup>wim/wim</sup> double mutant embryos resemble  
264 *Ift172*<sup>wim/wim</sup> embryos showing exencephaly lacking a ventral midline groove (Fig. 5G). In the  
265 neural tube, we found *Inpp5e*<sup>rdg/rdg</sup>;*Ift172*<sup>wim/wim</sup> double mutants specified no FoxA2- or Nkx2.2-  
266 positive cells, and had normal numbers of Nkx6.1-positive cells similar to *Ift172*<sup>wim/wim</sup> single  
267 mutants (Fig. 5H, H', H''), suggesting that the *Inpp5e*<sup>rdg/rdg</sup> phenotype is *Ift172*-dependent and  
268 that *Inpp5e* functions within cilia. However, we observed Olig2-positive cells in  
269 *Inpp5e*<sup>rdg/rdg</sup>;*Ift172*<sup>wim/wim</sup> double mutants similar to the pattern in *Inpp5e*<sup>rdg/rdg</sup> single mutants,  
270 suggesting some *Ift172*-independent *Inpp5e* function.

271

272 *Smo*-dependent and -independent functions of *Inpp5e*

273

274 Ciliary Smo enrichment correlates with Smo activation (Corbit et al., 2005). Given that  
275 Inpp5e appeared to act within the cilium, we explored the relationship of Inpp5e and Smo. To do  
276 this, we intercrossed *Inpp5e<sup>rdg/+</sup>;Smo<sup>bnb/+</sup>* transheterozygous animals which should generate  
277 double mutant embryos at a frequency of 1 out of 16 embryos. We identified fewer  
278 *Inpp5e<sup>rdg/rdg</sup>;Smo<sup>bnb/bnb</sup>* mutants (3%) than expected (6.25%), which is statistically significant  
279 (Chi-squared test,  $p=0.02$ ). Smo *bentbody*, *Smo<sup>bnb</sup>*, is a null allele and *Smo<sup>bnb/bnb</sup>* embryos have  
280 a closed, misshapen head and fail to complete embryonic turning before dying by E9.5  
281 (Casparly et al., 2002) (Fig. 5I). In neural tube sections, *Smo<sup>bnb/bnb</sup>* lack ventral cell fate  
282 specification so do not express the Shh-dependent cell markers FoxA2, Nkx2.2, and Olig2 (Fig.  
283 5J, J'). At E9.5, *Inpp5e<sup>rdg/rdg</sup>;Smo<sup>bnb/bnb</sup>* double mutant embryos were small with partially turned  
284 or unturned bodies similar to *Smo<sup>bnb/bnb</sup>* mutants (66%, 6/9). Unlike *Smo<sup>bnb/bnb</sup>* single mutant  
285 embryos, *Inpp5e<sup>rdg/rdg</sup>;Smo<sup>bnb/bnb</sup>* double mutant embryos displayed exencephaly (55%, 5/9) (Fig.  
286 5K). In the neural tube of *Inpp5e<sup>rdg/rdg</sup>;Smo<sup>bnb/bnb</sup>* mutants, we detected no expression of FoxA2  
287 or Nkx2.2, cell fates requiring the highest Shh response (Fig. 5L, L'). The lack of ventral cell  
288 fates resembled the *Smo<sup>bnb/bnb</sup>* mutant and indicated that Inpp5e requires Smo function to  
289 specify these cell fates. In contrast, unlike *Smo<sup>bnb/bnb</sup>* mutant neural tube sections, we observed  
290 Olig2 and Nkx6.1 expression in *Inpp5e<sup>rdg/rdg</sup>;Smo<sup>bnb/bnb</sup>* double mutant embryos (Fig. 5J', J'', L',  
291 L''). Thus, specific ventral cell fates in *Inpp5e<sup>rdg/rdg</sup>* can be specified without Smo. The most  
292 parsimonious interpretation of these data is that the absence of Inpp5e function permits  
293 derepression of Shh signaling but only to a level permitting an intermediate Shh response.

294

295 *Neural tube patterning recovery at E12.5 is dependent on Gli3*

296

297 Both the *Inpp5e<sup>rdg/rdg</sup>;lft172<sup>wim/wim</sup>* and *Inpp5e<sup>rdg/rdg</sup>;Smo<sup>bnb/bnb</sup>* double mutant embryos  
298 express Olig2-positive pMN cells, suggesting that there may be derepression of these cell fates  
299 when Inpp5e is lost. In the neural tube, Gli3 is the major repressor of Shh signaling (Litingtung  
300 and Chiang, 2000, Persson et al., 2002), and we previously showed that the GliR gradient plays  
301 a critical role between E10.5 and E12.5 to properly specify cell fate (Su et al., 2012). We  
302 performed Western blots in order to examine Gli processing in *Inpp5e<sup>rdg/rdg</sup>* animals. Using  
303 antibodies against Gli2 and Gli3 which detect full-length (185kD Gli2 and 190kD Gli3) and  
304 cleaved Gli3 protein (83 kD Gli3R), we evaluated whole embryo protein extracts at E10.5 and  
305 E12.5 (Fig. 6A-B). We note that full-length Gli protein does not represent activated Gli protein.  
306 We observed no change in full-length Gli2 (Gli2FL) or Gli3 (Gli3FL) between wild type and

307 *Inpp5e*<sup>rdg/rdg</sup> at either E10.5 or E12.5. We saw no change in the 83kD Gli3 band in *Inpp5e*<sup>rdg/rdg</sup>  
308 compared to wild type at either E10.5 or E12.5. These data suggest that the overall levels of  
309 Gli2FL, Gli3FL and Gli3R are unaltered in homogenized *Inpp5e*<sup>rdg/rdg</sup> embryos.

310 In order to determine whether Gli3 repressor is functionally altered in *Inpp5e*<sup>rdg/rdg</sup>  
311 embryos, we evaluated *Inpp5e*<sup>rdg/rdg</sup>;*Gli3*<sup>Δ/Δ</sup> double mutants. At E12.5, we found the *Gli3*<sup>Δ/Δ</sup>  
312 mutants specified FoxA2-, Nkx2.2- and Olig2-positive cells in the same domains as the control  
313 and *Inpp5e*<sup>rdg/rdg</sup> littermates (Fig. 6C-E, Fig. 3). This is consistent with previous reports of *Gli3*<sup>Δ/Δ</sup>  
314 mutants displaying normal specification of these cell fates (Litingtung and Chiang, 2000,  
315 Persson et al., 2002). In contrast, we found dorsally scattered FoxA2- and Nkx2.2-positive cells  
316 and an expansion of both Olig2- and Nkx6.1-positive cells in E12.5 *Inpp5e*<sup>rdg/rdg</sup>;*Gli3*<sup>Δ/Δ</sup> neural  
317 tubes (Fig. 6G-I), as well as a dorsal shift in Pax6 staining boundary (Fig. 6J). This indicates the  
318 recovery of patterning we observed in *Inpp5e*<sup>rdg/rdg</sup> mutant embryos by E12.5 does not occur in  
319 *Inpp5e*<sup>rdg/rdg</sup>;*Gli3*<sup>Δ/Δ</sup> mutant embryos. These data demonstrate that the *Inpp5e*<sup>rdg/rdg</sup> recovery  
320 phenotype at E12.5 is Gli3-dependent and strongly implicates the GliR gradient in the recovery.

## 321 322 Discussion

323  
324 Our data point to *Inpp5e* regulating the Shh response through a more complicated  
325 mechanism than previously appreciated. In vitro, we found *Inpp5e*<sup>rdg/rdg</sup> MEFs did not respond to  
326 Shh stimulation, consistent with previous reports that *Inpp5e* plays a positive role in Shh signal  
327 transduction (Garcia-Gonzalo et al., 2015, Dyson et al., 2017, Chavez et al., 2015). However, in  
328 vivo we found *Inpp5e*<sup>rdg/rdg</sup> embryos displayed an expansion of ventral cell fates in the neural  
329 tube indicating loss of negative regulation of the pathway. Importantly, we observed distinct cell  
330 fates requiring high, intermediate and low levels of Shh response in the *Inpp5e*<sup>rdg/rdg</sup> mutant  
331 neural tube signifying graded pathway regulation remained. Furthermore, we found that the  
332 mispatterning of the E10.5 *Inpp5e*<sup>rdg/rdg</sup> neural tube recovered by E12.5 and that the recovery  
333 depended on Gli3, which functions predominantly as a repressor in the neural tube. This finding  
334 is consistent with our genetic test of the relationship between *Inpp5e* and *Smo*, where we found  
335 the *Inpp5e*<sup>rdg/rdg</sup>;*Smo*<sup>bnb/bnb</sup> neural tube exhibited cell fates requiring intermediate levels of Shh  
336 response such as Olig2 and Nkx6.1. As *Smo* is essential for Shh signal transduction, this result  
337 implies a derepression of intermediate cell fates occurs when *Inpp5e* function is lost in  
338 combination with loss of *Smo* function. *Inpp5e* localizes to cilia and we showed that the  
339 *Inpp5e*<sup>rdg/rdg</sup> phenotype largely depended on the presence of cilia, consistent with *Inpp5e*  
340 regulating Shh signaling from within the cilium. We showed the *Inpp5e* mutant alleles are

341 sensitive to strain background, which along with the complementation test, enabled us to  
342 demonstrate that *Inpp5e*<sup>rdg</sup> is a functional null allele.

343

344 The simplest model to explain the expansion of ventral fates we observed in *Inpp5e*<sup>rdg/rdg</sup>  
345 mutants is that *Inpp5e* normally serves as a negative regulator of Shh signal transduction.  
346 However, that interpretation is complicated by the normal cell fate specification we observed in  
347 E12.5 *Inpp5e*<sup>rdg/rdg</sup> embryos along with our finding that *Inpp5e* function is required for the Shh  
348 response in cell culture which aligns with previously published work (Chavez et al., 2015, Dyson  
349 et al., 2017, Garcia-Gonzalo et al., 2015). These data indicate that *Inpp5e* regulates the Shh  
350 response over time and can act as both a positive and negative regulator of the pathway. Thus,  
351 any model of *Inpp5e* function must reconcile these distinct observations.

352

353 Other negative regulators of Shh signaling fall into two classes: those whose loss leads  
354 to complete constitutive activation of the pathway such as *Ptch1*, *SuFu* or *Gnas* (encoding  $G\alpha_s$ )  
355 mutants, and those whose loss is slightly less severe such as *Tulp3*, *Gpr161* or *Rab23* mutants  
356 (Mukhopadhyay et al., 2013, Norman et al., 2009, Patterson et al., 2009, Goodrich et al., 1997,  
357 Cooper et al., 2005, Svard et al., 2006). *Ptch1*, *SuFu* and  $G\alpha_s$  maintain the pathway in an “off”  
358 state when ligand is not present so their loss leads to complete pathway activation: increased  
359 GliA production, almost no GliR production, and specification of neural fates requiring the  
360 highest Shh response. In contrast, *Tulp3*, *Gpr161* and *Rab23* adjust the output of the pathway  
361 without being essential; they attenuate the pathway. *Inpp5e* appears to function in this second  
362 category: both the *Inpp5e*<sup>rdg</sup> and *Inpp5e* <sup>$\Delta Ex2-6$</sup>  alleles allow multiple ventral neural cell fates to be  
363 specified, indicating that the GliA/GliR ratio is altered consistent with the expanded Shh activity  
364 gradient we observed (Dyson et al., 2017). Furthermore, our findings that the recovery of neural  
365 patterning in *Inpp5e*<sup>rdg/rdg</sup> embryos between E10.5 and E12.5 is Gli3-dependent along with  
366 *Inpp5e*<sup>rdg/rdg</sup>; *Smo*<sup>bnb/bnb</sup> mutant embryos exhibiting derepression of *Olig2* and *Nkx6.1* expression  
367 are consistent with lowered GliR production in *Inpp5e*<sup>rdg/rdg</sup> mutants. Reduced GliR production  
368 alters the effective GliA/GliR ratio consistent with the expansion of ventral cell fates in  
369 *Inpp5e*<sup>rdg/rdg</sup> mutants. The GliA/GliR ratio appears highly variable based on the intermingling of  
370 cell fates in the *Inpp5e*<sup>rdg/rdg</sup> neural tube. Taken together, these observations indicate that *Inpp5e*  
371 is an attenuator of Shh signaling in specifying neural cell fates and hint that it is critical for the  
372 temporal control of the activator to repressor ratio in the neural tube.

373

374 Similar to previous findings in cultured cells, we found *Inpp5e*<sup>rdg/rdg</sup> mutant MEFs  
375 exhibited no Shh transcriptional response (Chavez et al., 2015, Dyson et al., 2017, Garcia-  
376 Gonzalo et al., 2015). We derived the MEFs from embryos carrying the *Inpp5e*<sup>rdg</sup> allele on an  
377 FVB background, the same genetic background on which we observed an expansion of Shh-  
378 dependent cell fates in the neural tube. Thus, in contrast to its function in the neural tube,  
379 *Inpp5e* plays a positive role in promoting the Shh response in MEFs. While at the surface  
380 contradictory, this adds *Inpp5e*<sup>rdg</sup> to the list of mutations in Shh signal transduction components  
381 that reveal distinctions in their neural and fibroblast phenotypes (Gigante et al., 2018, Larkins et  
382 al., 2011, Pusapati et al., 2018).

383  
384 The variance in cell sensitivity to Shh ligand between fibroblasts (NIH/3T3 cells) and  
385 neural progenitors lacking Gpr161 is proposed to be due to cell type-specific differences in PKA  
386 activity (Pusapati et al., 2018). Differential PKA activity could also explain the distinct  
387 phenotypes in fibroblasts and neural progenitors lacking functional *Inpp5e*. Loss of *Inpp5e*  
388 function in fibroblasts elevates ciliary PIP<sub>2</sub> levels leading to increased recruitment of Tulp3 and  
389 Gpr161, which in turn increases PKA activity resulting in an absence of Shh target gene  
390 expression (Garcia-Gonzalo et al., 2015, Mukhopadhyay et al., 2013). While we observed a  
391 higher percentage of Tulp3-positive cilia in the *Inpp5e*<sup>rdg/rdg</sup> neural tube compared to wild type,  
392 the recruitment of Gpr161 to cilia was limited. Concomitantly, we found a significant increase in  
393 the region over which Smo enrichment in cilia was visible in the *Inpp5e*<sup>rdg/rdg</sup> ventral neural tube.  
394 The combination of less ciliary Gpr161 and more ciliary Smo would be predicted to result in  
395 lower PKA activity in the neural progenitors compared to the MEFs which could render the cells  
396 more sensitive to Shh ligand. This would also be consistent with a low level of GliR production in  
397 the E10.5 *Inpp5e*<sup>rdg/rdg</sup> neural tube.

398  
399 Taken together, our data support a model in which loss of *Inpp5e* function results in the  
400 alteration of the normal effective Gli ratio formed from the additive result of the GliA and GliR  
401 concentration gradients (Fig. 7). A delay in GliR gradient formation would alter the kinetics of the  
402 effective Gli ratio such that there is an initial excess of GliA function that normalizes over time as  
403 the standard GliA/GliR ratio forms (Fig. 7B). This model reconciles the seemingly discordant  
404 aspects of the *Inpp5e* phenotypes in several ways. First, in *Inpp5e*<sup>rdg/rdg</sup> mutants at E9.5 and  
405 E10.5 low GliR production would derepress known GliR targets: Nkx6.1 and Olig2. This  
406 derepression was also evident in the *Inpp5e*<sup>rdg/rdg</sup>; *lft172*<sup>wim/wim</sup> mutants as well as the  
407 *Inpp5e*<sup>rdg/rdg</sup>; *Smo*<sup>bnb/bnb</sup> mutants. At the same time, low GliR production would increase the



408 effective GliA/GliR ratio which would specify more FoxA2- and Nkx2.2-positive cell fates, as we  
409 saw at E9.5 and E10.5 in *Inpp5e*<sup>rdg/rdg</sup> mutants. Second, the fact that the recovery of *Inpp5e*<sup>rdg/rdg</sup>  
410 neural patterning is Gli3-dependent argues that the GliR gradient does eventually form. Finally,  
411 the fact that *Inpp5e*<sup>rdg/rdg</sup> and *Inpp5e*<sup>ΔEx7-8/ΔEx7-8</sup> MEFs do not respond to Shh ligand is consistent  
412 with fibroblasts being more efficient than neural progenitors at GliR production.

413

414 The intermingling of cell fates in the *Inpp5e*<sup>rdg/rdg</sup> neural tube suggests that the GliA/GliR  
415 ratio is likely quite dynamic and variable from cell to cell. The Gli3-dependent recovery of  
416 pattern in E12.5 neural tube argues that Gli3 (the predominant repressor) is biologically  
417 significant even if statistically significant differences cannot be seen on Western blots. We note  
418 the formal possibility that *Inpp5e* also changes the kinetics of GliA production; however,  
419 changes in the kinetics of GliR production are sufficient to explain the apparent increase in the  
420 levels of effective GliA resulting in ventral cell fate expansion. Cells can also integrate the level  
421 of Shh signaling over time by taking into account the duration of Gli activity in a process known  
422 as temporal adaptation (Stamatakis et al., 2005, Dessaud et al., 2007). Cells exposed to lower  
423 concentrations of Shh lose Gli responsiveness faster than cells exposed to high concentrations  
424 of Shh, allowing cells to interpret both concentration and duration of exposure (Dessaud et al.,  
425 2007). Thus, the model we propose awaits techniques that monitor GliA and GliR in situ at the  
426 cellular level and over time to tease these two possibilities apart.

427

428 Our model can reconcile some additional discrepancies. Unlike the general expansion of  
429 neural cell fates we saw in the *Inpp5e*<sup>rdg/rdg</sup> mutants, the *Inpp5e*<sup>ΔEx2-6/ΔEx2-6</sup> mutant specifies no  
430 floor plate (requiring the highest levels of Shh signaling) and an expansion of more intermediate  
431 cell fates (Dyson et al., 2017). That allele, like the *Inpp5e*<sup>ΔEx7-8</sup> allele, is on a C57BL/6 genetic  
432 background and both display perinatal lethality (Dyson et al., 2017, Jacoby et al., 2009). We  
433 found the *Inpp5e*<sup>rdg/rdg</sup> and *Inpp5e*<sup>ΔEx7-8/ΔEx7-8</sup> embryos both died at E13.5 on an FVB background  
434 but viable homozygous animals were present at E16.5 on a C57BL/6 background. In the context  
435 of our model, these data would predict genetic background alters the kinetics of GliA/GliR ratio  
436 production. This is consistent with *Inpp5e* acting as an attenuator of the Shh pathway.

437

438 The relationship between *Inpp5e* and *Smo* is both straightforward and enigmatic,  
439 highlighting the complexity of *Inpp5e* function. This may be best illustrated by the fact that we  
440 found slightly less than half as many *Inpp5e*<sup>rdg/rdg</sup>; *Smo*<sup>bnb/bnb</sup> double mutant embryos at E9.5 as  
441 expected. These missing embryos are likely biologically significant and further work is needed to



442 define their time of lethality. Nevertheless, their loss is consistent with *Inpp5e* playing an  
443 important role in relation to time. Previous work showed that many phenotypes exhibited by  
444 embryos expressing constitutively activated *Smo* (*SmoM2* allele) can be rescued by *Inpp5e*<sup>ΔEx2-</sup>  
445 <sup>6/ΔEx2-6</sup>, consistent with our finding that the *Inpp5e*<sup>rdg/rdg</sup> phenotype is *Smo*-dependent and arguing  
446 that *Inpp5e* functions at a step downstream of *Smo* (Dyson et al., 2017). It also suggests that  
447 *Inpp5e* loss reduces the activator output of the pathway providing in vivo evidence that *Inpp5e*  
448 plays a positive role in regulating *Shh* signal transduction. However, the expansion of ventral  
449 neural fates displayed by E10.5 *Inpp5e*<sup>ΔEx2-6/ΔEx2-6</sup> or *Inpp5e*<sup>rdg/rdg</sup> mutants implies *Inpp5e*  
450 negatively regulates the *Shh* response. This is likely explained, in part, by the links between  
451 PI(4)P, *Ptch1* and *Smo* along with the diminished ciliary PI(4)P in the absence of *Inpp5e*  
452 function (Garcia-Gonzalo et al., 2015, Chavez et al., 2015, Yavari et al., 2010, Jiang et al.,  
453 2016). Such roles occur upstream of activated *Smo* so would be masked in the context of the  
454 *SmoM2* allele.

455  
456 The increase in ciliary *Smo* in *Inpp5e*<sup>rdg/rdg</sup> neural tubes is consistent with the expansion  
457 of ventral cell fates. Ciliary *Smo* enrichment normally clears *Gpr161* from cilia, thereby removing  
458 the pathway's basal repression machinery. However, we observed 34% of cilia were *Gpr161*-  
459 positive in *Inpp5e*<sup>rdg/rdg</sup>. *Inpp5e* knockdown in IMCD3 cells leads to the simultaneous presence of  
460 both *Smo* and *Gpr161* in cilia (Badgandi et al., 2017). Furthermore, ciliary clearance of *Gpr161*  
461 can be uncoupled from *Shh* activation (Pusapati et al., 2018). These data together suggest that  
462 loss of *Inpp5e* uncouples the normal regulatory mechanism between *Smo* and *Gpr161* and  
463 could explain how signaling occurs in the presence of ciliary *Gpr161* (Badgandi et al., 2017, Pal  
464 et al., 2016). Our finding of *Tulp3* in almost all *Inpp5e*<sup>rdg/rdg</sup> neural tube cilia raises another  
465 possibility. *Tulp3* is known to traffic multiple GPCRs into the cilium as well as other molecules  
466 known to regulate the *Shh* pathway, so perhaps *Tulp3* is regulating another modulator of the  
467 *Shh* response (Mukhopadhyay et al., 2010, Hwang et al., 2019, Legue and Liem, 2019, Han et  
468 al., 2019, Badgandi et al., 2017). Taken together, this would explain the paradoxical increase in  
469 *Shh* signaling in the presence of high *Tulp3* and *Gpr161* seen in our embryos.

470  
471 *Inpp5e* functions within cilia to maintain the PI(4)P membrane composition and our  
472 analysis is consistent with *Inpp5e* functioning within cilia to regulate *Shh* signaling. Other  
473 enzymes that impact PI(4)P are known to regulate Hedgehog (*Hh*) in *Drosophila*, where the  
474 pathway does not rely on cilia, suggesting that PI signaling is an ancient mechanism for *Hh*  
475 regulation (Yavari et al., 2010). The fact that our data argue *Inpp5e* plays a critical role for *Shh*

476 signal transduction over time is provocative. Other than the reliance on cilia, the fundamental  
477 distinction between vertebrate and invertebrate Hh signaling is that vertebrates use Hh for long-  
478 range signaling. Previous data showed that changing the kinetics of ciliary traffic can alter the  
479 output of the Shh pathway (Ocbina et al., 2011). Thus, we speculate that vertebrate Hh  
480 signaling through/via cilia may enable cells to control the duration or timing of the Shh signal.

481  
482 In conclusion, our data provide genetic evidence that *Inpp5e* attenuates Shh signaling in  
483 the developing mouse neural tube. Our data add to the existing function of *Inpp5e* and argue  
484 that it plays both positive and negative regulatory roles in Shh signal transduction, likely through  
485 controlling the timing of Gli processing and thus the sensitivity of cells to respond to Shh ligand,  
486 both in the dorsal-ventral axis and over time. These data also highlight the phenotypic variability  
487 among *Inpp5e* mutant cell types and alleles, expanding our knowledge on the role of Shh  
488 signaling duration in regulating ventral neural cell fate.

489

#### 490 **Acknowledgments**

491 We are grateful to K. Anderson for the Smo antibody, S. Mukhopadhyay for the Gpr161  
492 antibody and J. Eggenschwiler for the Tulp3 antibody. We are also grateful to S. Mukhopadhyay  
493 for critical comments on the manuscript along with members of the Caspary lab. We thank C.  
494 Lin for his initial *Inpp5e<sup>rdg</sup>* observations. The content is solely the responsibility of the authors  
495 and does not necessarily reflect the official views of the National Institute of Health.

496

#### 497 **Competing interests**

498 No competing interests declared

499

#### 500 **Funding**

501 This work was supported by funding from National Institutes of Health grants R01NS090029,  
502 R01GM110663 and R35GM122549 as well as a March of Dimes grant FY15-343 with additional  
503 support from the Emory University Integrated Cellular Imaging Microscopy Core of the Emory  
504 Neuroscience NINDS Core Facilities grant, P30NS055077.

505

#### 506 **Figure Legends**

507

508 **Figure 1:**

509

510 **Inpp5e negatively regulates the Shh signaling response in the E10.5 neural tube.**

511 (A-J) Caudal (hindlimb) sections of E10.5 wild type (A-E, n=4) and *Inpp5e<sup>rdg/rdg</sup>* (F-J, n=4) neural  
512 tubes stained with antibodies against the indicated transcription factors. (A, F) *Inpp5e<sup>rdg/rdg</sup>*  
513 mutants display normal Shh expression in the floor plate. (B, G, C, H, D, I) FoxA2, Olig2, Nkx2.2  
514 and Nkx6.1 are expanded dorsally in *Inpp5e<sup>rdg/rdg</sup>* mutants. The FoxA2, Olig2 and Nkx2.2  
515 domains are intermixed with a few dorsally scattered FoxA2 cells (G, asterisks). (E, J) The Pax6  
516 domain is shifted dorsally in *Inpp5e<sup>rdg/rdg</sup>* mutants compared to wild type littermates. (K, M)  
517 Whole mount and (L, N) neural tube sections of *Inpp5e<sup>+/+</sup>;Ptch1<sup>LacZ/+</sup>* (n=5) and  
518 *Inpp5e<sup>rdg/rdg</sup>;Ptch1<sup>LacZ/+</sup>* embryos (n=5) stained for  $\beta$ -galactosidase activity, which reflects Shh  
519 activity. (K-N) *Inpp5e<sup>rdg/rdg</sup>;Ptch1<sup>LacZ/+</sup>* mutants display a dorsal expansion of  $\beta$ -galactosidase  
520 activity in the neural tube compared to wild type littermates. Extent of gradient indicated by  
521 black triangle. (O-P) Wild type (n=3) and *Inpp5e<sup>rdg/rdg</sup>* (n=3) neural tube sections stained with  
522 antibodies against Smo and cilia marker Arl13b. Bracket depicts region containing Smo-positive  
523 cilia. (O', O'', P' P'') Enlarged view of cilia from region indicated by dotted boxes in O and P. (Q)  
524 Schematic describing quantification of region of Smo staining and graph reflecting percentage of  
525 ventricular lumen displaying ciliary Smo enrichment (see Methods for details). Values displayed  
526 are mean  $\pm$  SEM of three biological replicates analyzed by two tailed unpaired t-test with  
527 Welch's correction. \*\*\*p<0.001. Scale bars: 100 $\mu$ m for A-J, L, N, O, and P; 400 $\mu$ m for K and M;  
528 10 $\mu$ m for O', O'', P', and P''.

529

530 **Figure 2:**

531

532 ***Inpp5e<sup>rdg</sup>*, carrying a D511G mutation, is a functional null allele of *Inpp5e*.** (A) Schematic  
533 showing the protein domain structure of *Inpp5e*, including the location of the amino acid change.  
534 *Inpp5e<sup>rdg</sup>* contains an aspartic acid to glycine change at position 511 as a result of an A-to-G  
535 transition in the coding strand (NM\_033134.3:c2164A>G). (B) Exon structure of *Inpp5e*, based on  
536 NCBI reference sequence NM\_033134.3, showing location of deleted exons in two previously  
537 characterized alleles. Note: diagrams in A and B are aligned, indicating that D511G is located  
538 within exon 7, in *Inpp5e*'s phosphatase domain. (C) Alignment of protein sequence surrounding  
539 position 511 of mouse *Inpp5e* showing the aspartic acid is conserved across multiple species.  
540 (D-G) Whole mount images of E12.5 embryos. (E) *Inpp5e<sup>rdg/rdg</sup>* mutants display exencephaly  
541 and microphthalmia (n=20). Note: these animals are on a mixed FVB/C3H background so that  
542 the retinal pigment epithelium cells are visible. (F) *Inpp5e<sup>rdg/ $\Delta$ Ex7-8</sup>* embryos resemble *Inpp5e<sup>rdg/rdg</sup>*  
543 mutants, indicating the alleles fail to complement (n= 4). (G) *Inpp5e <sup>$\Delta$ Ex7-8/ $\Delta$ Ex7-8</sup>* mutants have the

544 same appearance as *Inpp5e*<sup>rdg/rdg</sup> (n=9). (H) qRT-PCR of *Gli1*, a Shh transcriptional target, in  
545 *Inpp5e*<sup>rdg/+</sup> and *Inpp5e*<sup>rdg/rdg</sup> MEFs in the presence (+) and absence (-) of Shh treatment.  
546 *Inpp5e*<sup>rdg/rdg</sup> MEFs do not respond to Shh. Values displayed are mean ± SEM, analyzed by two-  
547 way ANOVA using Tukey correction for multiple comparisons. \*\*p<0.01. ns, not significant. Data  
548 is from three independent experiments. (I-K) *Inpp5e*<sup>rdg/rdg</sup> mutants on C57BL/6J background  
549 survive to E16.5 and display exencephaly, microphthalmia, and spina bifida to varying degrees  
550 of severity (n=6). Arrow points to spina bifida in caudal neural tube. (I' - K') Close up images  
551 showing hindlimb preaxial polydactyly. Arrow indicates extra digit. Scale bars: whole embryo  
552 1mm, hindlimb 500µm.

553

### 554 **Figure 3:**

555

556 **Normal ventral neural patterning in E12.5 *Inpp5e*<sup>rdg/rdg</sup> embryos reflects a recovery of Shh**  
557 **response.** Caudal (hindlimb) sections of E12.5 wild type (A-D) and *Inpp5e*<sup>rdg/rdg</sup> (E-H) neural  
558 tubes stained with antibodies against the indicated cell fates. (A-B, D, E-F, H) FoxA2, Nkx2.2  
559 and Pax6 expression domains look similar in wild type and *Inpp5e*<sup>rdg/rdg</sup> neural tube sections  
560 (wild type n=6, *Inpp5e*<sup>rdg/rdg</sup> n=5). (B-C, F-G) The Olig2 and Nkx6.1 domains in *Inpp5e*<sup>rdg/rdg</sup>  
561 neural tubes show only a few cells scattered dorsally compared to wild type littermates. Scale  
562 bar: 100µm.

563

### 564 **Figure 4:**

565

566 **Altered ciliary Tulp3 and Gpr161 in *Inpp5e*<sup>rdg/rdg</sup> neural tubes.** (A-F, H-M) Images of cilia  
567 found in the ventral most region of E10.5 caudal (hindlimb) sections of wild type (A-C, H-J) and  
568 *Inpp5e*<sup>rdg/rdg</sup> (D-F, K-M) neural tubes stained with antibodies against Tulp3, Gpr161 and Arl13b.  
569 Insets show a single cilium digitally magnified. (A-F) Tulp3 is found in almost all cilia in the  
570 neural tube of *Inpp5e*<sup>rdg/rdg</sup> embryos but is absent from wild type cilia (wild type n=3, *Inpp5e*<sup>rdg/rdg</sup>  
571 n=3). (G) Graphical representation of percentage of Arl13b-positive cilia also staining for Tulp3  
572 (see Methods for details). (H-M) Gpr161 is found in an increased number of cilia in the neural  
573 tube of *Inpp5e*<sup>rdg/rdg</sup> when compared to wild type (wild type n=3, *Inpp5e*<sup>rdg/rdg</sup> n=3). (N)  
574 Quantification of the percentage of Arl13b-positive cilia also staining for Gpr161 (see Methods  
575 for details). Values displayed are mean ± SEM of three biological replicates analyzed by two  
576 tailed unpaired t-test with Welch's correction. \*\*\* p<0.001. Scale bar: 10µm.

577

578 **Figure 5:**

579

580 **Inpp5e is cilia dependent and depends on Smoothed to specify cell fates requiring the**

581 **highest Shh activity, but not those requiring moderate Shh activity.** E9.5 whole mount

582 images and neural tube staining of caudal (hindlimb) sections with indicated antibodies. (A, C)

583 Ventral view of control and *Inpp5e*<sup>rdg/rdg</sup> embryos highlighting exencephaly with prominent

584 midline groove in the mutant (*Inpp5e*<sup>rdg/rdg</sup> n=63). (B-B'', D-D'') Neural tube staining of control

585 and *Inpp5e*<sup>rdg/rdg</sup> embryos show ventral expansion of FoxA2, Nkx2.2, Olig2 and Nkx6.1 cell fates

586 in mutant (wild type n=4, *Inpp5e*<sup>rdg/rdg</sup> n=4). (E) Ventral view of *Ift172*<sup>wim/wim</sup> embryo showing

587 exencephaly without midline groove (n=20). (G) *Inpp5e*<sup>rdg/rdg</sup>;*Ift172*<sup>wim/wim</sup> mutants display

588 exencephaly that resembles the *Ift172*<sup>wim/wim</sup> mutant (n=6). (F-F'', H-H'') Neural tube staining of

589 both *Ift172*<sup>wim/wim</sup> and *Inpp5e*<sup>rdg/rdg</sup>;*Ift172*<sup>wim/wim</sup> show that these mutants fail to specify ventral cell

590 fates, indicating the *Inpp5e*<sup>rdg/rdg</sup> phenotype is cilia dependent (*Ift172*<sup>wim/wim</sup> n=1,

591 *Inpp5e*<sup>rdg/rdg</sup>;*Ift172*<sup>wim/wim</sup> n=3). (I) Side view of *Smo*<sup>bnb/bnb</sup> mutants reveals a small unturned body

592 with a closed head (n=73). (K) Side and dorsal views of *Inpp5e*<sup>rdg/rdg</sup>;*Smo*<sup>bnb/bnb</sup> embryos showing

593 unturned bodies similar to *Smo*<sup>bnb/bnb</sup> (n=9) although some have exencephaly, as seen in the

594 dorsal view (n=5/9). (J-J'') Neural tube staining confirms *Smo*<sup>bnb/bnb</sup> embryos do not specify

595 ventral cell fates as they cannot transduce the Shh response (n=1). (L-L'') *Inpp5e*<sup>rdg/rdg</sup>;*Smo*<sup>bnb/bnb</sup>

596 mutants lack floor plate (FoxA2) and p3 (Nkx2.2) specification, indicating *Inpp5e* requires *Smo*

597 to specify cell fates requiring the highest levels of Shh activity. In contrast,

598 *Inpp5e*<sup>rdg/rdg</sup>;*Smo*<sup>bnb/bnb</sup> mutants specify Olig2 and Nkx6.1 cells, indicating *Inpp5e* functions

599 independently of *Smo* to specify cell fates requiring moderate Shh activity (n=5). Scale bars:

600 whole embryo 1mm, neural tube sections 100µm.

601

602 **Figure 6:**

603

604 **Normal ventral neural patterning in E12.5 *Inpp5e*<sup>rdg/rdg</sup> embryos reflects a recovery of Shh**

605 **response and is Gli3-dependent.** (A) Western blot analysis of Gli2 and Gli3 in wild type and

606 *Inpp5e*<sup>rdg/rdg</sup> whole embryo extracts. Asterisk denotes non-specific band. (B) Quantification of A.

607 Data are mean ± SEM of three biological replicates. ns, not significant. Caudal (hindlimb)

608 sections of E12.5 *Gli3*<sup>Δ/Δ</sup> (C-F) and *Inpp5e*<sup>rdg/rdg</sup>;*Gli3*<sup>Δ/Δ</sup> (G-J) neural tubes stained with antibodies

609 against the indicated cell fates. (C-F) FoxA2, Olig2 and Nkx2.2 expression are normal, and

610 Pax6 is expressed correctly in *Gli3*<sup>Δ/Δ</sup> neural tube sections (n=2). (G-I) FoxA2, Olig2 and Nkx6.1

611 cells are dorsally scattered (expanded) in E12.5 *Inpp5e*<sup>rdg/rdg</sup>;*Gli3*<sup>Δ/Δ</sup> neural tube compared to

612 *Gli3*<sup>Δ/Δ</sup> neural tube. The lumen shape of E12.5 *Inpp5e*<sup>rdg/rdg</sup>; *Gli3*<sup>Δ/Δ</sup> neural tube resembles that of  
613 *Inpp5e*<sup>rdg/rdg</sup> at E10.5 (Fig. 1) (n=3). Scale bar: 100μm.

614

## 615 **Figure 7:**

616

### 617 **Model for *Inpp5e*'s role over time in *Shh*-dependent ventral neural tube patterning.** (A)

618 The relative amounts of GliA to GliR specify neural cell fates at any particular position along the  
619 ventral-dorsal axis. The combined ratio is the effective Gli ratio (Gli + or Gli -) which integrates  
620 the relative ratio of GliA to GliR production. (B) (Top) Normally, the effective Gli ratio doesn't  
621 change over time, leading to normal cell fates. (Bottom) The expanded ventral neural progenitor  
622 cell fates in *Inpp5e*<sup>rdg/rdg</sup> mutants at E9.5 normalize by E12.5 due to changes in the effective Gli  
623 ratio. While multiple mechanisms are possible, the simplest explanation posits that loss of  
624 *Inpp5e* initially alters GliR gradient production and, over time, the GliR gradient is normalized  
625 and the ventral cell fates are returned to their correct positions by E12.5.

626

## 627 **Supplemental Figure 1:**

628

### 629 ***Inpp5e*<sup>ΔEx7-8/ΔEx7-8</sup> embryos show expanded ventral cell fates at E10.5 and recovery at**

630 **E12.5.** Caudal (hindlimb) sections of E10.5 and E12.5 neural tube sections stained with

631 antibodies against indicated cell fates. (A-J) E10.5 *Inpp5e*<sup>ΔEx7-8/ΔEx7-8</sup> mutants show expanded

632 ventral cell fates and *Shh* activity compared to wild type embryos (wild type n=6, *Inpp5e*<sup>ΔEx7-</sup>

633 <sup>8/ΔEx7-8</sup> n=4). This phenotype is similar to what we observed in *Inpp5e*<sup>rdg/rdg</sup> mutants (see Fig. 1F-

634 J). (K-T) At E12.5, these expanded cell fates have returned to normal, with few cells scattered

635 dorsally (wild type n=6, *Inpp5e*<sup>ΔEx7-8/ΔEx7-8</sup> n=2). Scale bars: 100μm.

636

## 637 **Materials and Methods**

638

### 639 *Mouse lines and maintenance*

640

641 All mice were cared for in accordance with NIH guidelines and Emory's Institutional

642 Animal Care and Use Committee (IACUC). Alleles used were: *Inpp5e*<sup>rdg</sup> [MGI:6295836],

643 *Ptch1*<sup>LacZ</sup> (*Ptch1*<sup>tm1Mps</sup>) [MGI:1857447], *Inpp5e*<sup>ΔEx7-8</sup> (*Inpp5e*<sup>tm1.2Ssch</sup>) [MGI: 4360187], *Ift172*<sup>wim</sup>

644 [MGI: 2682066], *Smo*<sup>bnb</sup> [MGI: 2137553], *Gli3*<sup>fl</sup> (*Gli3*<sup>tm1Alj</sup>) [MGI: 3798847] and *CAGGCre-ER*<sup>TM</sup>



645 (Tg(CAG-cre/Esr1&)5Amc) [MGI: 2182767]. *Inpp5e*<sup>ΔEx7-8/+</sup> animals were generated by crossing  
646 *Inpp5e*<sup>fl/fl</sup> (*Inpp5e*<sup>tm1.1<sup>Ssch</sup></sup>) [MGI: 4360186] animals to *CAGGCre-ER*<sup>TM</sup> animals and treating  
647 pregnant dams with tamoxifen as previously described (Su et al., 2012). *Inpp5e*<sup>fl/fl</sup> animals were  
648 received at Emory University and rederived on C57BL/6J. They, and the derived *Inpp5e*<sup>ΔEx7-8/+</sup>  
649 mice, are maintained on FVB/NJ. *Inpp5e*<sup>rdg/rdg</sup>; *Gli3*<sup>Δ/Δ</sup> embryos were generated by crossing  
650 *Inpp5e*<sup>rdg/+</sup>; *Gli3*<sup>fl/+</sup> and *Inpp5e*<sup>rdg/+</sup>; *Gli3*<sup>fl/+</sup>; *CAGGCre-ER*<sup>TM</sup> animals and treating pregnant dams  
651 with tamoxifen at E7.5 as previously described (Su et al., 2012). *CAGGCre-ER*<sup>TM</sup>, *Ptch1*<sup>LacZ</sup>,  
652 *Ift172*<sup>wim</sup>, *Smo*<sup>bnb</sup>, and *Gli3*<sup>fl</sup> were on a C3H/HeJ background when this project began and are  
653 currently maintained with *Inpp5e*<sup>rdg</sup> on FVB/NJ. Genotyping was performed as previously  
654 described or with Transnetyx, Inc. (Goodrich et al., 1997, Blaess et al., 2008, Jacoby et al.,  
655 2009, Kasarskis et al., 1998, Hayashi and McMahon, 2002, Sun et al., 2012). Timed mating of  
656 heterozygous intercrosses was performed with animals less than a year old to generate  
657 embryos of the indicated embryonic stage.

658

#### 659 *Mouse dissection, X-gal staining and immunofluorescence*

660

661 Embryos were dissected in cold phosphate-buffered saline (PBS) and processed for  
662 either X-gal staining or immunofluorescence.

663 Embryos were stained with X-gal as previously described (Goodrich et al., 1997). After  
664 fixing in 4% paraformaldehyde (PFA) overnight at 4°C, embryos were incubated in 30% sucrose  
665 in 0.1M phosphate buffer, pH 7.3, at 4°C overnight prior to being embedded in OCT (Tissue-  
666 Tek) and 40μm sections were obtained on a Leica CM1850 cryostat.

667 For immunofluorescence, embryos were fixed for 1 h in 4% PFA on ice. Embryos were  
668 processed through sucrose and OCT as above, before sectioning at 10μm. Sections were  
669 incubated with primary and secondary antibodies diluted in PBS with 0.1% Triton X and either  
670 1% or 10% heat inactivated goat serum. The following primary antibodies were used: mouse  
671 anti-Shh clone 5E1 (1:10), mouse anti-Nkx2.2 clone 74.5A5, mouse anti-Nkx6.1 clone F65A2,  
672 and mouse anti-Pax6 (1:100) from Developmental Studies Hybridoma Bank; rabbit anti-FoxA2  
673 (Cell Signaling, #3143; 1:500), rabbit anti-Olig2 (Millipore, AB9610; 1:300), rabbit anti-Smo (kind  
674 gift from K. Anderson; 1:1000), mouse anti-Arl13b (Neuromab, N295B/66; 1:2000), rabbit anti-  
675 Tulp3 (kind gift from J. Eggenschwiler; 1:500), and rabbit anti-Gpr161 (kind gift from S.  
676 Mukhopadhyay; 1:200). The secondary antibodies were conjugated to Alexa Fluor 488, 568, or  
677 594 (ThermoFisher; 1:200). Hoechst 33342 (Sigma; 1:3000) was included in the incubation of  
678 slides with secondary antibody.

679

680 *Smo, Gpr161 and Tulp3 quantification*

681

682 Three sections from each embryo (wild type n=3, *Inpp5e<sup>rdg/rdg</sup>* n=3) were used for  
683 quantification of ciliary Smo, Tulp3 and Gpr161. To quantify the Smo expansion, the  
684 measurement tool in FIJI image processing software package was used to draw a line around  
685 the entire neural tube lumen (Schindelin et al., 2012). The distance over which ciliary Smo  
686 enrichment was observed was determined and reported as a percentage of the total distance of  
687 the neural tube lumen. To quantify Tulp3 and Gpr161, the number of Arl13b positive luminal cilia  
688 which were also positive for either Tulp3 or Gpr161 in the ventral 10% of the neural tube were  
689 counted using the counting plugin in FIJI. Three sections from each embryo (wild type n=3,  
690 *Inpp5e<sup>rdg/rdg</sup>* n=3), between 400 and 500 cilia, were counted for each condition per genotype.  
691 Statistical significance was evaluated on three biological replicates in PRISM v8.1.1 using two  
692 tailed unpaired t-test with Welch's correction.

693

694 *MEF generation, RNA isolation and qPCR quantitation*

695

696 Mouse embryonic fibroblasts (MEFs) were isolated from E12.5 embryos and  
697 immortalized as previously described (Mariani et al., 2016). Genotypes were verified by PCR.  
698 For Shh treatment, *Inpp5e<sup>rdg/+</sup>* and *Inpp5e<sup>rdg/rdg</sup>* MEFs were grown at a density of  $0.5 \times 10^6$   
699 cells/mL and treated for 24 h with Shh-conditioned medium containing 0.5% fetal bovine serum  
700 (Larkins et al., 2011).

701 For qPCR, whole RNA was extracted from MEFs and qPCR was carried out as  
702 previously described (Bay et al., 2018, Gigante et al., 2018). The following primers were used  
703 (5'-3'): Gli1 (GCCACACAAGTGCACGTTTG and AAGGTGCGTCTTGAGGTTTTCA); Gapdh  
704 (CGTCCCGTAGACAAAATGGT and GAATTTGCCGTGAGTGGAGT) (Bay et al., 2018). Each  
705 reaction was performed in technical triplicate. Gli1 values were normalized to Gapdh within each  
706 sample. Statistical significance was evaluated in PRISM v8.1.1 by applying a two-way ANOVA  
707 with Tukey correction for multiple analysis on three biological replicates.

708

709 *Western Blotting*

710 Western blotting was performed as previously described (Chang et al., 2016, Mariani et  
711 al., 2016, Bay et al., 2018) with the following antibodies: Gli2 (R&D Systems, AF3635, 1:500),  
712 Gli3 (R&D Systems, AF3690, 1:1000), and HRP-conjugated donkey anti-goat IgG (Jackson

713 ImmunoResearch, 1:5000). Lysates were made using RIPA buffer with Roche protease  
714 inhibitors (Chang et al., 2016). Values displayed are volume intensity as measured from a  
715 chemiluminescent image and normalized to total protein as measured on a stain-free gel.  
716 Statistical significance was evaluated in PRISM v8.1.1 by applying a two-way ANOVA with  
717 Tukey correction for multiple analysis on three biological replicates.

## References

- Badgandi, H. B., Hwang, S. H., Shimada, I. S., Lorient, E. and Mukhopadhyay, S.** (2017). Tubby family proteins are adapters for ciliary trafficking of integral membrane proteins. *J Cell Biol*, **216**, 743-760.
- Bangs, F. and Anderson, K. V.** (2017). Primary Cilia and Mammalian Hedgehog Signaling. *Cold Spring Harb Perspect Biol*, **9**.
- Bay, S. N., Long, A. B. and Caspary, T.** (2018). Disruption of the ciliary GTPase Arl13b suppresses Sonic hedgehog overactivation and inhibits medulloblastoma formation. *Proc Natl Acad Sci U S A*, **115**, 1570-1575.
- Bielas, S. L., Silhavy, J. L., Brancati, F., Kisseleva, M. V., Al-Gazali, L., Sztriha, L., Bayoumi, R. A., Zaki, M. S., Abdel-Aleem, A., Rosti, R. O., et al.** (2009). Mutations in INPP5E, encoding inositol polyphosphate-5-phosphatase E, link phosphatidylinositol signaling to the ciliopathies. *Nat Genet*, **41**, 1032-6.
- Blaess, S., Stephen, D. and Joyner, A. L.** (2008). Gli3 coordinates three-dimensional patterning and growth of the tectum and cerebellum by integrating Shh and Fgf8 signaling. *Development*, **135**, 2093-103.
- Briscoe, J., Pierani, A., Jessell, T. M. and Ericson, J.** (2000). A homeodomain protein code specifies progenitor cell identity and neuronal fate in the ventral neural tube. *Cell*, **101**, 435-45.
- Caspary, T., Garcia-Garcia, M. J., Huangfu, D., Eggenschwiler, J. T., Wyler, M. R., Rakeman, A. S., Alcorn, H. L. and Anderson, K. V.** (2002). Mouse Dispatched homolog1 is required for long-range, but not juxtacrine, Hh signaling. *Curr Biol*, **12**, 1628-32.
- Chang, C. F., Chang, Y. T., Millington, G. and Brugmann, S. A.** (2016). Craniofacial Ciliopathies Reveal Specific Requirements for GLI Proteins during Development of the Facial Midline. *PLoS Genet*, **12**, e1006351.
- Chavez, M., Ena, S., Van Sande, J., de Kerchove d'Exaerde, A., Schurmans, S. and Schiffmann, S. N.** (2015). Modulation of Ciliary Phosphoinositide Content Regulates Trafficking and Sonic Hedgehog Signaling Output. *Dev Cell*, **34**, 338-50.
- Chiang, C., Litington, Y., Lee, E., Young, K. E., Corden, J. L., Westphal, H. and Beachy, P. A.** (1996). Cyclopia and defective axial patterning in mice lacking Sonic hedgehog gene function. *Nature*, **383**, 407-13.
- Cooper, A. F., Yu, K. P., Brueckner, M., Brailey, L. L., Johnson, L., McGrath, J. M. and Bale, A. E.** (2005). Cardiac and CNS defects in a mouse with targeted disruption of suppressor of fused. *Development*, **132**, 4407-17.
- Corbit, K. C., Aanstad, P., Singla, V., Norman, A. R., Stainier, D. Y. and Reiter, J. F.** (2005). Vertebrate Smoothed functions at the primary cilium. *Nature*, **437**, 1018-21.
- Dessaud, E., Yang, L. L., Hill, K., Cox, B., Ulloa, F., Ribeiro, A., Mynett, A., Novitsch, B. G. and Briscoe, J.** (2007). Interpretation of the sonic hedgehog morphogen gradient by a temporal adaptation mechanism. *Nature*, **450**, 717.
- Ding, Q., Motoyama, J., Gasca, S., Mo, R., Sasaki, H., Rossant, J. and Hui, C. C.** (1998). Diminished Sonic hedgehog signaling and lack of floor plate differentiation in Gli2 mutant mice. *Development*, **125**, 2533-43.
- Dyson, J. M., Conduit, S. E., Feeney, S. J., Hakim, S., DiTommaso, T., Fulcher, A. J., Sriratana, A., Ramm, G., Horan, K. A., Gurung, R., et al.** (2017). INPP5E regulates phosphoinositide-dependent cilia transition zone function. *J Cell Biol*, **216**, 247-263.
- Echelard, Y., Epstein, D. J., St-Jacques, B., Shen, L., Mohler, J., McMahon, J. A. and McMahon, A. P.** (1993). Sonic hedgehog, a member of a family of putative signaling molecules, is implicated in the regulation of CNS polarity. *Cell*, **75**, 1417-30.

- Ericson, J., Rashbass, P., Schedl, A., Brenner-Morton, S., Kawakami, A., van Heyningen, V., Jessell, T. M. and Briscoe, J.** (1997). Pax6 controls progenitor cell identity and neuronal fate in response to graded Shh signaling. *Cell*, **90**, 169-80.
- Garcia-Gonzalo, F. R., Phua, S. C., Roberson, E. C., Garcia, G., 3rd, Abedin, M., Schurmans, S., Inoue, T. and Reiter, J. F.** (2015). Phosphoinositides Regulate Ciliary Protein Trafficking to Modulate Hedgehog Signaling. *Dev Cell*, **34**, 400-409.
- Gigante, E. D., Long, A. B., Ben-Ami, J. and Caspary, T.** (2018). Hypomorphic Smo mutant with inefficient ciliary enrichment disrupts the highest level of vertebrate Hedgehog response. *Dev Biol*, **437**, 152-162.
- Goetz, S. C. and Anderson, K. V.** (2010). The primary cilium: a signalling centre during vertebrate development. *Nat Rev Genet*, **11**, 331-44.
- Goodrich, L. V., Johnson, R. L., Milenkovic, L., McMahon, J. A. and Scott, M. P.** (1996). Conservation of the hedgehog/patched signaling pathway from flies to mice: Induction of a mouse patched gene by Hedgehog. *Genes & Development*, **10**, 301-312.
- Goodrich, L. V., Milenkovic, L., Higgins, K. M. and Scott, M. P.** (1997). Altered neural cell fates and medulloblastoma in mouse patched mutants. *Science*, **277**, 1109-13.
- Han, S., Miyoshi, K., Shikada, S., Amano, G., Wang, Y., Yoshimura, T. and Katayama, T.** (2019). TULP3 is required for localization of membrane-associated proteins ARL13B and INPP5E to primary cilia. *Biochem Biophys Res Commun*, **509**, 227-234.
- Hayashi, S. and McMahon, A. P.** (2002). Efficient recombination in diverse tissues by a tamoxifen-inducible form of Cre: a tool for temporally regulated gene activation/inactivation in the mouse. *Dev Biol*, **244**, 305-18.
- Haycraft, C. J., Banizs, B., Aydin-Son, Y., Zhang, Q., Michaud, E. J. and Yoder, B. K.** (2005). Gli2 and Gli3 localize to cilia and require the intraflagellar transport protein polaris for processing and function. *PLoS Genet*, **1**, e53.
- Huangfu, D. and Anderson, K. V.** (2005). Cilia and Hedgehog responsiveness in the mouse. *Proc Natl Acad Sci U S A*, **102**, 11325-30.
- Huangfu, D., Liu, A., Rakean, A. S., Murcia, N. S., Niswander, L. and Anderson, K. V.** (2003). Hedgehog signalling in the mouse requires intraflagellar transport proteins. *Nature*, **426**, 83-7.
- Hwang, S. H., Somatilaka, B. N., Badgandi, H., Palicharla, V. R., Walker, R., Shelton, J. M., Qian, F. and Mukhopadhyay, S.** (2019). Tulp3 Regulates Renal Cystogenesis by Trafficking of Cystoproteins to Cilia. *Curr Biol*, **29**, 790-802 e5.
- Jacoby, M., Cox, J. J., Gayral, S., Hampshire, D. J., Ayub, M., Blockmans, M., Pernot, E., Kisseleva, M. V., Compere, P., Schiffmann, S. N., et al.** (2009). INPP5E mutations cause primary cilium signaling defects, ciliary instability and ciliopathies in human and mouse. *Nat Genet*, **41**, 1027-31.
- Jiang, K., Liu, Y., Fan, J., Zhang, J., Li, X. A., Evers, B. M., Zhu, H. and Jia, J.** (2016). PI(4)P Promotes Phosphorylation and Conformational Change of Smoothed through Interaction with Its C-terminal Tail. *PLoS Biol*, **14**, e1002375.
- Kasarskis, A., Manova, K. and Anderson, K. V.** (1998). A phenotype-based screen for embryonic lethal mutations in the mouse. *Proc Natl Acad Sci U S A*, **95**, 7485-90.
- Kisseleva, M. V., Wilson, M. P. and Majerus, P. W.** (2000). The isolation and characterization of a cDNA encoding phospholipid-specific inositol polyphosphate 5-phosphatase. *J Biol Chem*, **275**, 20110-6.
- Larkins, C. E., Aviles, G. D., East, M. P., Kahn, R. A. and Caspary, T.** (2011). Arl13b regulates ciliogenesis and the dynamic localization of Shh signaling proteins. *Mol Biol Cell*, **22**, 4694-703.
- Legue, E. and Liem, K. F., Jr.** (2019). Tulp3 Is a Ciliary Trafficking Gene that Regulates Polycystic Kidney Disease. *Curr Biol*, **29**, 803-812 e5.



- Lek, M., Dias, J. M., Marklund, U., Uhde, C. W., Kurdija, S., Lei, Q., Sussel, L., Rubenstein, J. L., Matise, M. P., Arnold, H. H., et al.** (2010). A homeodomain feedback circuit underlies step-function interpretation of a Shh morphogen gradient during ventral neural patterning. *Development*, **137**, 4051-60.
- Litingtung, Y. and Chiang, C.** (2000). Specification of ventral neuron types is mediated by an antagonistic interaction between Shh and Gli3. *Nat Neurosci*, **3**, 979-85.
- Liu, A., Wang, B. and Niswander, L. A.** (2005). Mouse intraflagellar transport proteins regulate both the activator and repressor functions of Gli transcription factors. *Development*, **132**, 3103-11.
- Mariani, L. E., Bijlsma, M. F., Ivanova, A. A., Suci, S. K., Kahn, R. A. and Caspar, T.** (2016). Arl13b regulates Shh signaling from both inside and outside the cilium. *Mol Biol Cell*.
- Matise, M. P., Epstein, D. J., Park, H. L., Platt, K. A. and Joyner, A. L.** (1998). Gli2 is required for induction of floor plate and adjacent cells, but not most ventral neurons in the mouse central nervous system. *Development*, **125**, 2759-2770.
- Moore, B. S., Stepanchick, A. N., Tewson, P. H., Hartle, C. M., Zhang, J., Quinn, A. M., Hughes, T. E. and Mirshahi, T.** (2016). Cilia have high cAMP levels that are inhibited by Sonic Hedgehog-regulated calcium dynamics. *Proc Natl Acad Sci U S A*, **113**, 13069-13074.
- Mukhopadhyay, S., Wen, X., Chih, B., Nelson, C. D., Lane, W. S., Scales, S. J. and Jackson, P. K.** (2010). TULP3 bridges the IFT-A complex and membrane phosphoinositides to promote trafficking of G protein-coupled receptors into primary cilia. *Genes Dev*, **24**, 2180-93.
- Mukhopadhyay, S., Wen, X., Ratti, N., Loktev, A., Rangell, L., Scales, S. J. and Jackson, P. K.** (2013). The ciliary G-protein-coupled receptor Gpr161 negatively regulates the Sonic hedgehog pathway via cAMP signaling. *Cell*, **152**, 210-23.
- Niewiadomski, P., Kong, J. H., Ahrends, R., Ma, Y., Humke, E. W., Khan, S., Teruel, M. N., Novitsch, B. G. and Rohatgi, R.** (2014). Gli protein activity is controlled by multisite phosphorylation in vertebrate Hedgehog signaling. *Cell Rep*, **6**, 168-181.
- Norman, R. X., Ko, H. W., Huang, V., Eun, C. M., Ablner, L. L., Zhang, Z., Sun, X. and Eggenschwiler, J. T.** (2009). Tubby-like protein 3 (TULP3) regulates patterning in the mouse embryo through inhibition of Hedgehog signaling. *Hum Mol Genet*, **18**, 1740-54.
- Ocbina, P. J. R., Eggenschwiler, J. T., Moskowitz, I. and Anderson, K. V.** (2011). Complex interactions between genes controlling trafficking in primary cilia. *Nature Genetics*, **43**, 547-U75.
- Pal, K., Hwang, S. H., Somatilaka, B., Badgandi, H., Jackson, P. K., DeFea, K. and Mukhopadhyay, S.** (2016). Smoothed determines beta-arrestin-mediated removal of the G protein-coupled receptor Gpr161 from the primary cilium. *J Cell Biol*, **212**, 861-75.
- Patterson, V. L., Damrau, C., Paudyal, A., Reeve, B., Grimes, D. T., Stewart, M. E., Williams, D. J., Siggers, P., Greenfield, A. and Murdoch, J. N.** (2009). Mouse hitchhiker mutants have spina bifida, dorso-ventral patterning defects and polydactyly: identification of Tulp3 as a novel negative regulator of the Sonic hedgehog pathway. *Hum Mol Genet*, **18**, 1719-39.
- Persson, M., Stamatakis, D., te Welscher, P., Andersson, E., Bose, J., Ruther, U., Ericson, J. and Briscoe, J.** (2002). Dorsal-ventral patterning of the spinal cord requires Gli3 transcriptional repressor activity. *Genes Dev*, **16**, 2865-78.
- Pusapati, G. V., Kong, J. H., Patel, B. B., Gouti, M., Sagner, A., Sircar, R., Luchetti, G., Ingham, P. W., Briscoe, J. and Rohatgi, R.** (2018). G protein-coupled receptors control the sensitivity of cells to the morphogen Sonic Hedgehog. *Sci Signal*, **11**.
- Ribes, V., Balaskas, N., Sasai, N., Cruz, C., Dessaud, E., Cayuso, J., Tozer, S., Yang, L. L., Novitsch, B., Marti, E., et al.** (2010). Distinct Sonic Hedgehog signaling dynamics



- specify floor plate and ventral neuronal progenitors in the vertebrate neural tube. *Genes Dev*, **24**, 1186-200.
- Riddle, R. D., Johnson, R. L., Laufer, E. and Tabin, C.** (1993). Sonic hedgehog mediates the polarizing activity of the ZPA. *Cell*, **75**, 1401-16.
- Roelink, H., Augsburger, A., Heemskerk, J., Korzh, V., Norlin, S., Ruiz i Altaba, A., Tanabe, Y., Placzek, M., Edlund, T., Jessell, T. M., et al.** (1994). Floor plate and motor neuron induction by vhh-1, a vertebrate homolog of hedgehog expressed by the notochord. *Cell*, **76**, 761-75.
- Rohatgi, R., Milenkovic, L. and Scott, M. P.** (2007). Patched1 regulates hedgehog signaling at the primary cilium. *Science*, **317**, 372-6.
- Sasaki, H. and Hogan, B. L.** (1994). HNF-3 beta as a regulator of floor plate development. *Cell*, **76**, 103-15.
- Schindelin, J., Arganda-Carreras, I., Frise, E., Kaynig, V., Longair, M., Pietzsch, T., Preibisch, S., Rueden, C., Saalfeld, S., Schmid, B., et al.** (2012). Fiji: an open-source platform for biological-image analysis. *Nat Methods*, **9**, 676-82.
- Stamatakis, D., Ulloa, F., Tsoni, S. V., Mynett, A. and Briscoe, J.** (2005). A gradient of Gli activity mediates graded Sonic Hedgehog signaling in the neural tube. *Genes Dev*, **19**, 626-41.
- Su, C. Y., Bay, S. N., Mariani, L. E., Hillman, M. J. and Caspary, T.** (2012). Temporal deletion of Arl13b reveals that a mispatterned neural tube corrects cell fate over time. *Development*, **139**, 4062-71.
- Sun, M., Mondal, K., Patel, V., Horner, V. L., Long, A. B., Cutler, D. J., Caspary, T. and Zwick, M. E.** (2012). Multiplex Chromosomal Exome Sequencing Accelerates Identification of ENU-Induced Mutations in the Mouse. *G3 (Bethesda)*, **2**, 143-50.
- Svard, J., Heby-Henricson, K., Persson-Lek, M., Rozell, B., Lauth, M., Bergstrom, A., Ericson, J., Toftgard, R. and Teglund, S.** (2006). Genetic elimination of Suppressor of fused reveals an essential repressor function in the mammalian Hedgehog signaling pathway. *Dev Cell*, **10**, 187-97.
- Tuson, M., He, M. and Anderson, K. V.** (2011). Protein kinase A acts at the basal body of the primary cilium to prevent Gli2 activation and ventralization of the mouse neural tube. *Development*, **138**, 4921-30.
- Wang, B., Fallon, J. F. and Beachy, P. A.** (2000). Hedgehog-regulated processing of Gli3 produces an anterior/posterior repressor gradient in the developing vertebrate limb. *Cell*, **100**, 423-34.
- Yavari, A., Nagaraj, R., Owusu-Ansah, E., Folick, A., Ngo, K., Hillman, T., Call, G., Rohatgi, R., Scott, M. P. and Banerjee, U.** (2010). Role of lipid metabolism in smoothed derepression in hedgehog signaling. *Dev Cell*, **19**, 54-65.

FIGURE 1

E10.5

Shh

FoxA2

Olig2  
Nkx2.2

Nkx6.1

Pax6

*Inpp5e*<sup>+/+</sup>

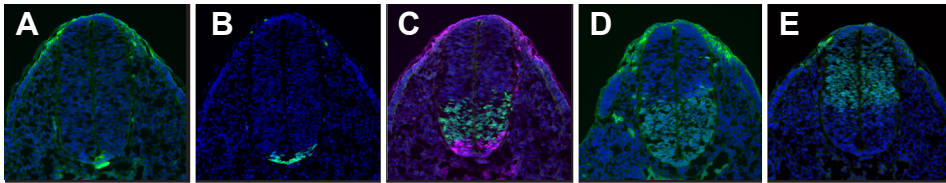

*Inpp5e*<sup>rdg/rdg</sup>

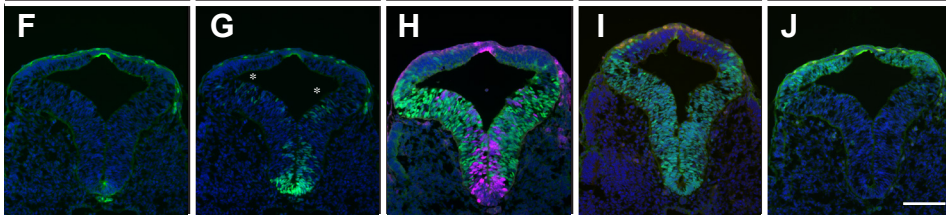

Smo  
Arl13b

Smo Arl13b

||||| Total distance  
||||| Smo distance

*Inpp5e*<sup>+/+</sup>;  
*Ptch1*<sup>lacZ/+</sup>

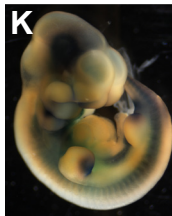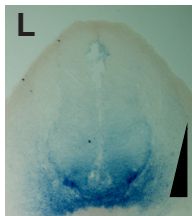

*Inpp5e*<sup>rdg/rdg</sup>;  
*Ptch1*<sup>lacZ/+</sup>

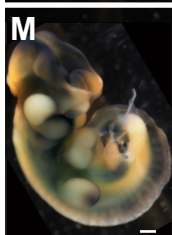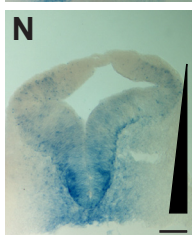

*Inpp5e*<sup>+/+</sup>

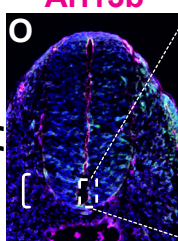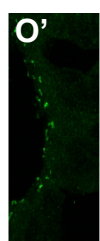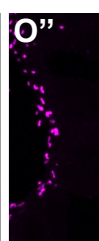

*Inpp5e*<sup>rdg/rdg</sup>

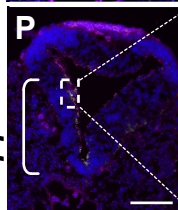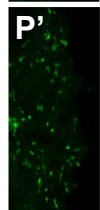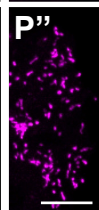

Q

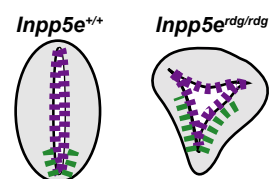

% of NT positive for Smo

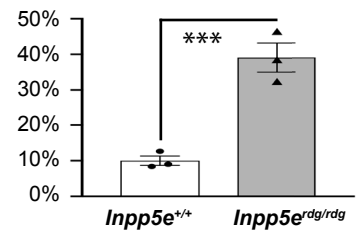

A

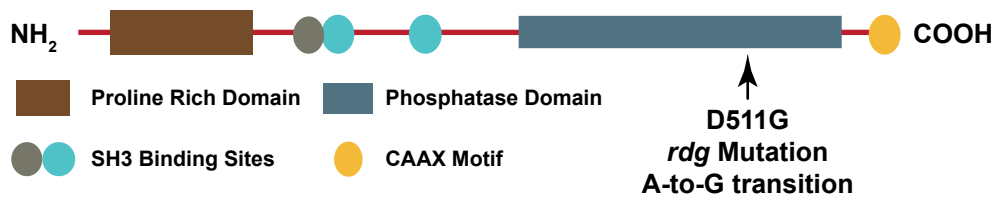

B

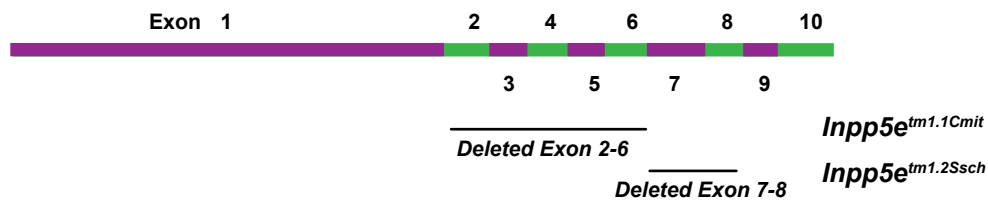

C

|            |                |      |     |
|------------|----------------|------|-----|
| Homo       | QGLVVDVPALLQHD | QDLT | 511 |
| Mus        | QKPEVDVLALLQHD | QDLT | 514 |
| Gallus     | QNPETGVSKLLAYD | QDLT | 526 |
| Xenopus    | SKLEKDMSRLLQYD | QDLT | 474 |
| Danio      | QGVGVDMSPLLQHD | QDLT | 501 |
| Drosophila | PLPSHLPHGYMHTD | QDLT | 603 |

H

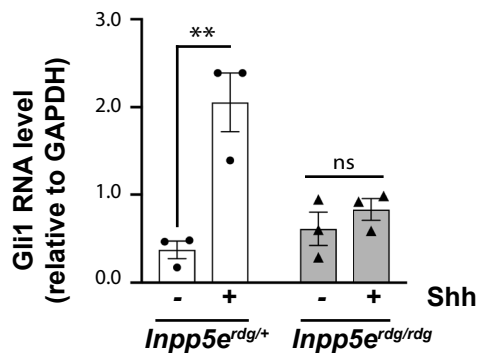

E12.5

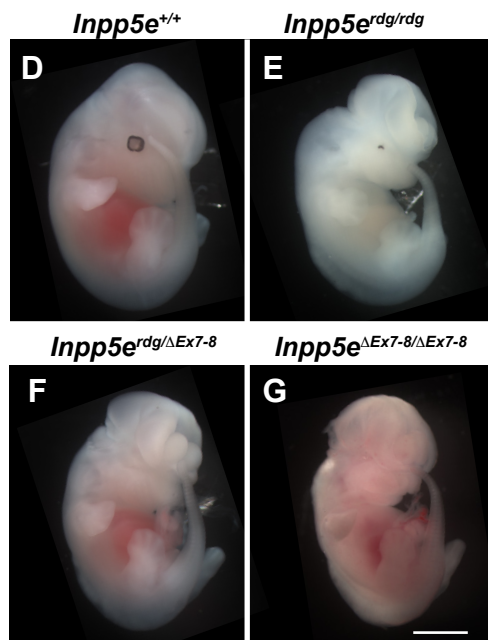

E16.5

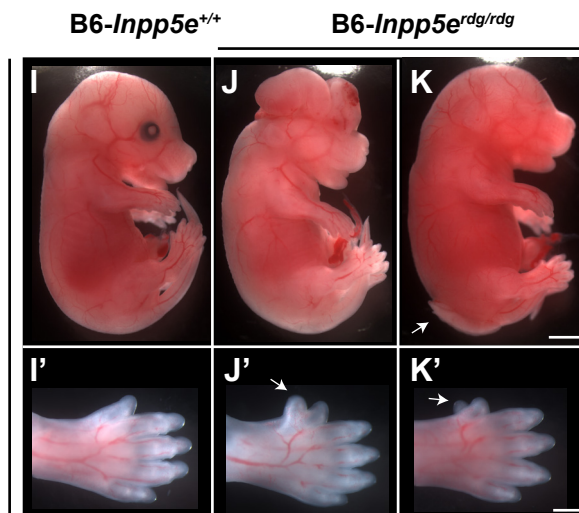

FIGURE 3

E12.5

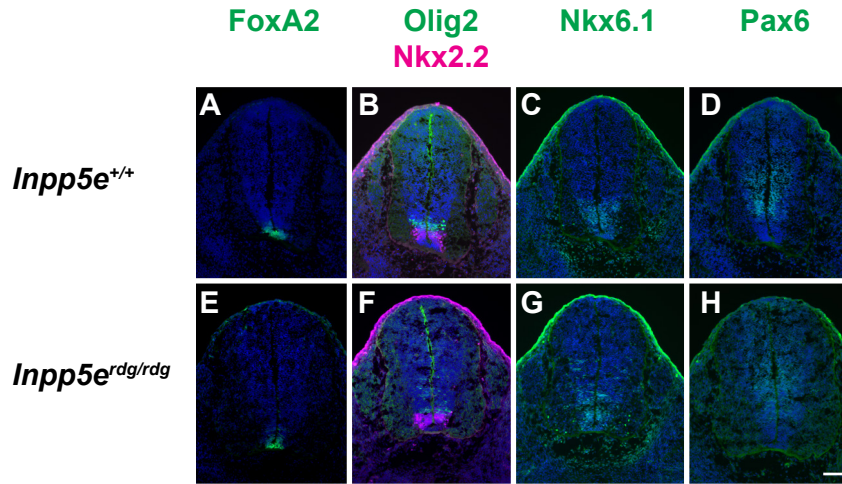

**FIGURE 4**

**E10.5**

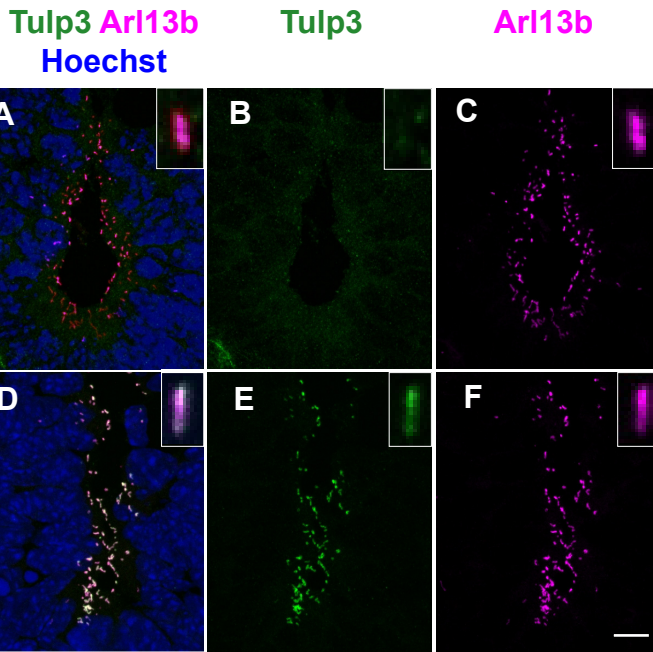

**G % Tulp3 Positive Cilia**

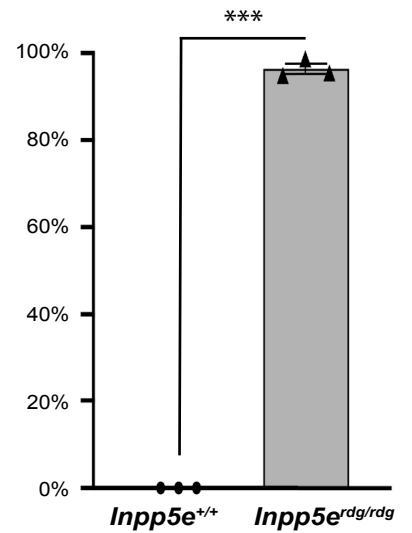

**Gpr161 Arl13b**  
**Hoechst**

**Gpr161**

**Arl13b**

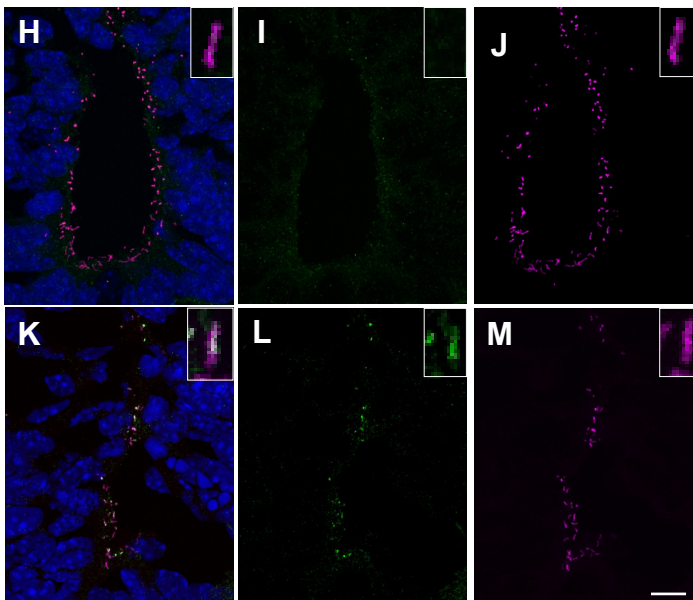

**N % Gpr161 Positive Cilia**

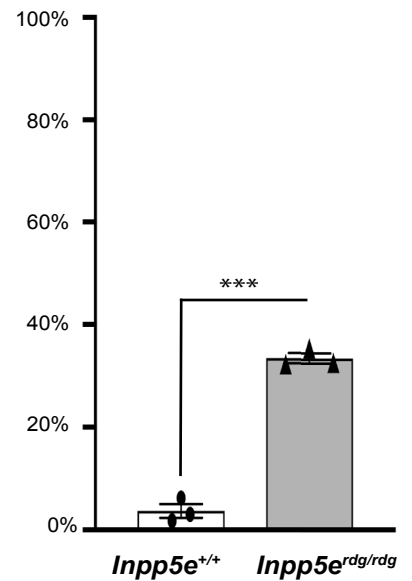



FIGURE 5

E9.5

FoxA2 Olig2 Nkx6.1  
Nkx2.2

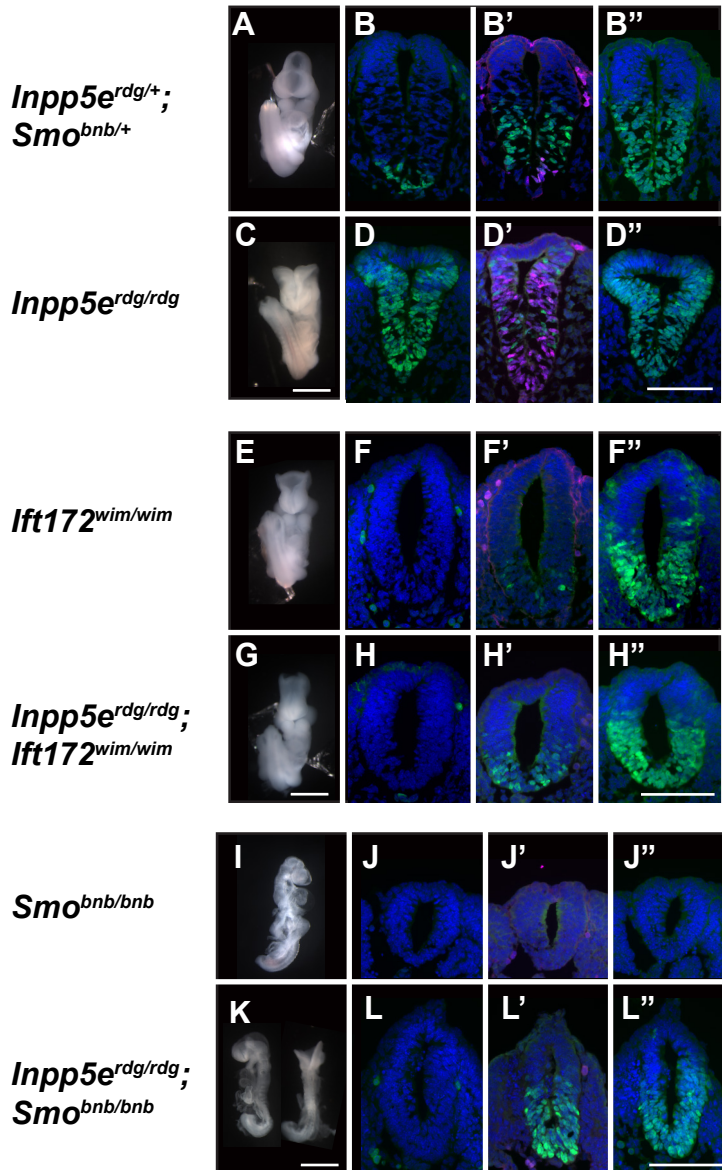



**FIGURE 6**

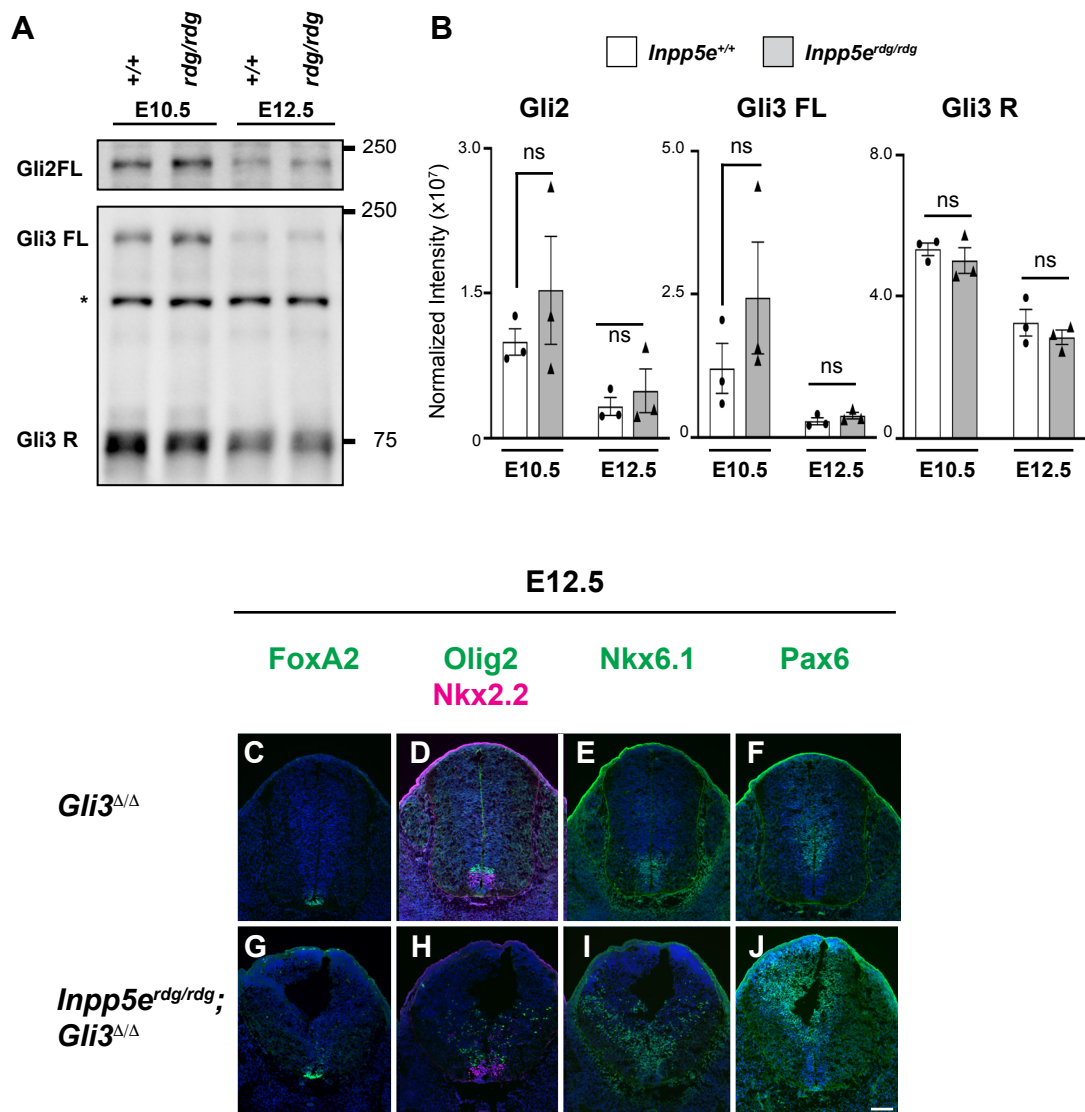

FIGURE 7

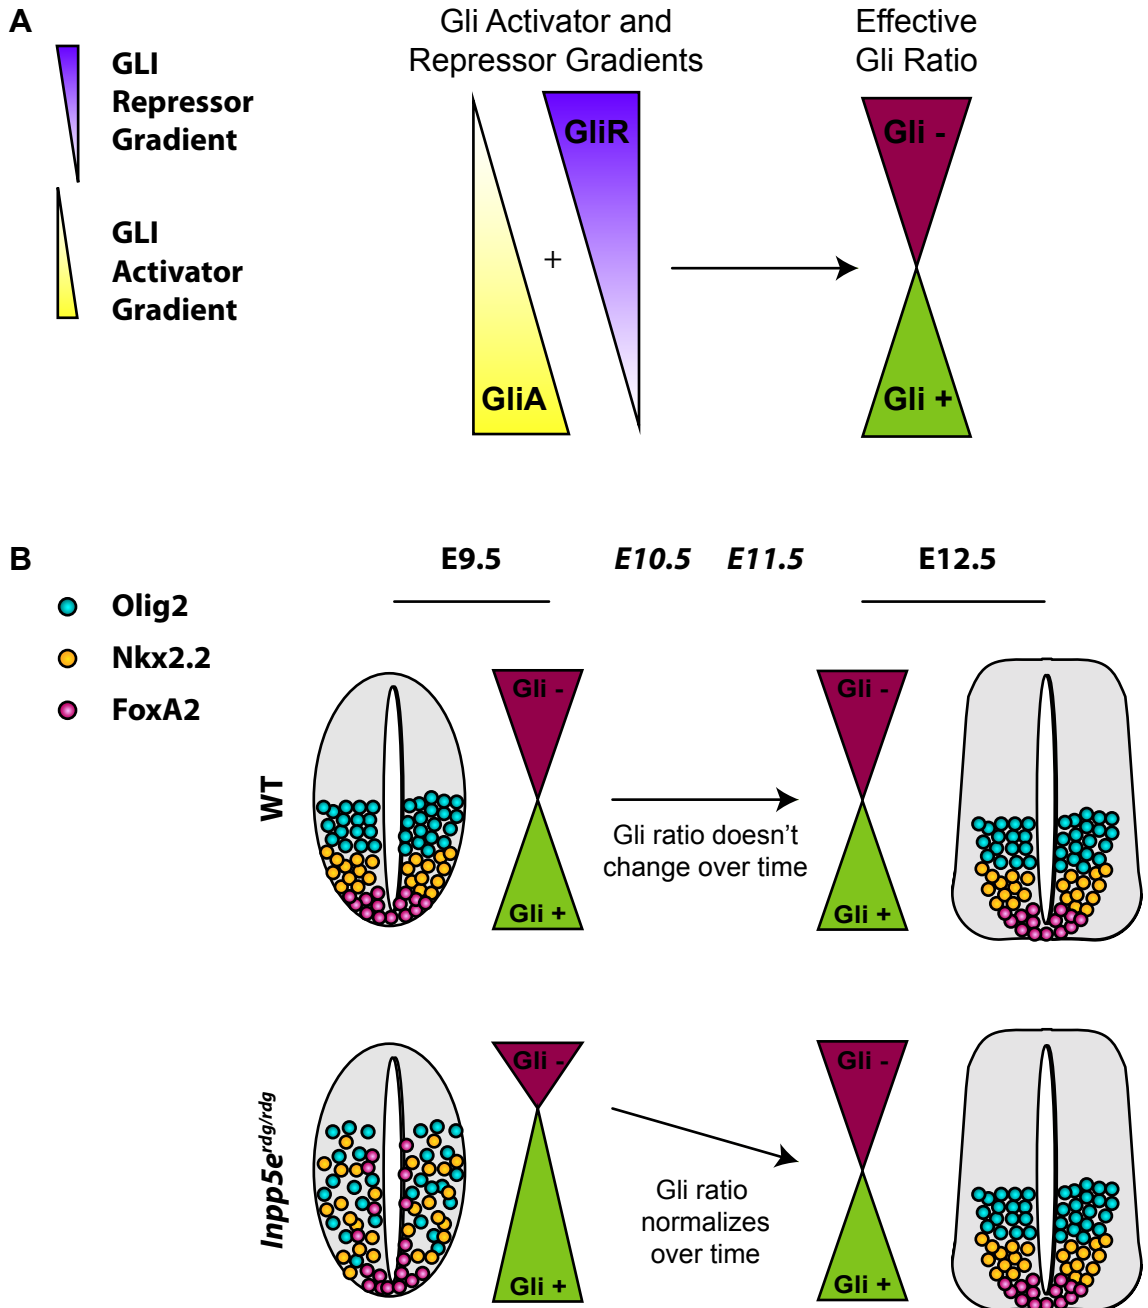

Source: https://www.biorxiv.org/content/10.1101/721399v1.full.pdf
